# Supplementary material for: Characteristics and Adoption Success of Shelter Dogs Assessed as Resource Guarders
Source: Animals (Basel). 2019 Nov 17;9(11):982. doi: 10.3390/ani9110982 (PMC6912206; doi:10.3390/ani9110982)
Supplement: Supplementary File 1 [file animals-09-00982-s001.xlsx]

## Sheet: First Adoptions Sept 2014-M
Name of dog	Animal Record Number	Resource guarder on fb or poss (0=no; 1=yes)	Category of resource guarder (0=no; 1=mild/mod; 2=extreme)	Return? (0=no; 1=yes)	Repro status (1=intact; 2=spay/neut)	Sex (0=female; 1=male)	Age (years)	Age class (0=less than 4 months; 1=4 months to less than 1 year; 2=from 1 year to less than 8 years; 3=from 8 years up)	Weight (pounds) for adults and seniors only	Size class (1=small;2=medium; 3=large)	Source (1=Owner surrender; 3=Seize; 4=Stray; 5=Transfer)	Resource guard on possession test (0=no; 1=yes)	Resource guard on food bowl (0=no; 1=yes)
Maizy	17231	0	0	0	2	0	0.25	0			1	0	0
Roscoe	18013	1	1	1	2	1	1.00	2	80.4	3	1	1	0
Maizey	17280	0	0	0	1	0	1.00	2	13.4	1	1	0	0
Melo	17304	0	0	0	1	1	1.00	2	65	3	1	0	0
Daisy	17311	0	0	0	1	0	0.83	1			1	0	0
Rascal	17417	0	0	0	1	1	0.25	0			1	0	0
Jaune	17418	0	0	0	1	1	0.25	0			1	0	0
Tibbs	17419	0	0	0	1	1	0.08	0			1	0	0
Pumpkin	17420	0	0	0	1	0	0.25	0			1	0	0
Rhett	17421	0	0	0	1	1	0.13	0			1	0	0
Scarlet	17422	0	0	0	1	0	0.25	0			1	0	0
Oliver	17423	0	0	0	1	1	0.25	0			1	0	0
Topher	18199	0	0	1	2	1	8.00	3	16.6	1	1	0	0
Jack	18377	0	0	1	2	1	3.00	2	14.2	1	5	0	0
Carter	17218	0	0	1	1	1	4.00	2	62	3	4	0	0
Katrina	17639	0	0	1	1	0	1.00	2	53	2	4	0	0
Bandit	17202	0	0	0	1	1	2.00	2	13	1	1	0	0
Gonzo	17279	0	0	0	2	1	1.00	2	13.4	1	1	0	0
James	17344	0	0	0	1	1	0.33	1			1	0	0
Boog	17841	1	1	1	1	1	0.75	1			1	1	0
Humphrey	17430	1	1	0	1	1	9.00	3	13.6	1	1	1	0
Raul	17536	0	0	0	2	1	2.00	2	37	2	1	0	0
Max Tiny Dog	17616	1	1	0	1	1	0.83	1			1	1	0
Darla	18206	1	2	1	2	0	6.00	2	12	1	5	1	0
Poppy Seed Beagle	17817	1	1	0	1	1	2.00	2	19	1	1	1	0
Gerta	18502	0	0	1	1	0	3.00	2	29.6	2	1	0	0
Sky	17942	0	0	0	1	0	2.00	2	45	2	1	0	0
Daisy	18017	1	1	0	1	0	1.00	2	52.4	2	1	1	0
Charlotte	18347	0	0	1	1	0	1.00	2	49	2	5	0	0
Henry Joseph	18074	1	2	0	2	1	13.00	3	14.8	1	1	1	0
Yukon	18735	1	2	1	1	1	2.00	2	92	3	4	1	1
Mickey	18087	0	0	0	1	0	0.67	1			1	0	0
Kiko	18111	1	1	0	1	0	3.00	2	55	3	4	1	0
Leigh	18256	0	0	1	1	0	2.00	2	52	2	5	0	0
Rocky	18165	0	0	0	1	1	2.00	2	62	3	1	0	0
Marcy	18180	0	0	0	1	0	5.00	2	63	3	1	0	0
Roscoe	18328	1	1	1	1	1	8.00	3	70.4	3	1	0	1
Buddy	18339	0	0	0	1	1	0.33	1			5	0	0
Ruger	18389	0	0	0	2	1	0.42	1			1	0	0
Klingon AKA Diane	22681	1	1	1	2	0	4.00	2	35	2	5	1	0
Nina	18556	1	1	0	2	0	2.00	2	50.4	2	1	1	0
Noodle	18557	1	1	0	2	0	2.00	2	10	1	1	1	0
Scooters AKA Summer	18598	0	0	1	2	0	5.00	2	14.8	1	1	0	0
Pokey	19010	1	1	1	2	0	10.00	3	22.2	1	5	1	0
Sam	18729	0	0	0	1	1	0.92	1			1	0	0
King	18820	1	2	1	1	1	2.00	2	104	3	1	1	1
Athena	18925	0	0	0	1	0	0.50	1			5	0	0
Emmett	18955	1	1	0	2	1	2.00	2	37.4	2	5	1	0
Marmaduke	18959	0	0	0	2	1	2.00	2	60	3	5	0	0
Duke	19216	1	2	1	2	1	4.00	2	73	3	5	1	1
Allie	19051	0	0	0	2	0	0.58	1			5	0	0
Meeko	19060	1	1	0	1	1	0.67	1			4	1	0
Ray	19138	1	1	0	1	1	1.00	2	73	3	4	1	1
Maria	19693	0	0	1	1	0	5.00	2	57	3	4	0	0
Sandy	19442	0	0	1	1	0	0.67	1			5	0	0
Shane	20214	0	0	1	2	1	2.00	2	80	3	1	0	0
Delilah	19299	1	2	0	2	0	3.00	2	9.6	1	1	1	1
Maxwell	19371	0	0	0	2	1	2.00	2	7.4	1	1	0	0
Bingo	20192	0	0	1	1	1	0.67	1			1	0	0
Wylie	19945	0	0	1	1	1	0.67	1			1	0	0
Pupperoni	19493	0	0	0	1	1	2.00	2	47	2	1	0	0
Beka	19525	0	0	0	1	0	0.50	1			4	0	0
Bella	19547	0	0	0	1	0	0.83	1			1	0	0
Spencer	19551	0	0	0	2	1	0.33	1			5	0	0
Mason	19552	0	0	0	2	1	1.00	2	44	2	5	0	0
Spunky	19553	0	0	0	2	0	2.00	2	16.1	1	5	0	0
Smokey	19578	0	0	0	1	1	1.00	2	42	2	1	0	0
Lux	22082	0	0	1	1	0	2.00	2	60	3	1	0	0
Penelope	19747	1	1	0	1	0	2.00	2	51.4	2	3	1	0
Fiona	19749	1	1	0	1	0	3.00	2	42	2	3	0	1
Aidan	19754	1	1	0	1	1	3.00	2	44	2	3	1	0
Meghan	19756	0	0	0	1	0	1.00	2	9.5	1	3	0	0
Bramble	19977	0	0	0	1	0	0.42	1			3	0	0
Willis	19740	0	0	0	1	1	5.00	2	36	2	5	0	0
Hyde	19984	0	0	1	2	1	2.00	2	25	2	4	0	0
Chloe	19836	0	0	0	1	0	0.83	1			1	0	0
Max	19804	1	1	0	1	1	3.91	2	12.6	1	4	1	1
Plinko	21301	0	0	1	2	0	4.00	2	39	2	1	0	0
Aaron	19866	0	0	0	1	1	0.42	1			4	0	0
Harper	19895	0	0	0	2	0	1.00	2	missing		5	0	0
Holly	19905	0	0	0	1	0	2.00	2	50	2	5	0	0
Honey Bee	19963	0	0	0	2	0	1.00	2	21	1	5	0	0
Charlie	20045	1	1	0	1	1	2.00	2	12	1	5	1	0
Fern	20164	1	1	1	1	0	0.50	1			5	0	1
Shep	20330	0	0	1	1	1	0.75	1			5	0	0
Daisy	20074	1	1	0	1	0	2.00	2	32	2	5	1	0
Eliza	20130	1	1	0	1	0	2.00	2	59	3	4	1	0
Fleet Wood	20146	1	1	0	1	1	3.00	2	60	3	5	1	0
L Bee	20147	0	0	0	1	0	8.00	3	74	3	1	0	0
Roxie	20223	1	1	0	2	0	4.00	2	6	1	1	0	1
Cocoa	20255	0	0	0	2	1	2.00	2	20.6	1	1	0	0
Jasmine	20272	1	1	0	2	0	6.00	2	68	3	1	0	1
Zoey	20282	0	0	0	2	0	4.00	2	48.6	2	5	0	0
Sydney	20293	0	0	0	1	0	2.00	2	47	2	4	0	0
Larry	20342	0	0	0	2	1	2.00	2	49	2	5	0	0
Swiss	21046	1	1	1	2	1	2.00	2	91.6	3	1	1	0
Jax	20352	1	1	0	2	1	5.00	2	45	2	1	1	0
Rex	20389	0	0	0	1	1	0.67	1			1	0	0
Marley	20419	1	1	0	1	1	0.75	1			5	1	1
Daisy Mae	20505	0	0	0	1	0	2.00	2	55	3	1	0	0
Sailor	20834	1	1	1	2	1	0.83	1			5	0	1
Tally	20589	1	1	0	2	0	5.00	2	86	3	1	1	1
Pearl	20707	0	0	0	2	0	4.00	2	28	2	5	0	0
Quinn	20738	0	0	0	2	0	0.58	1			5	0	0
Archie	20762	0	0	0	1	1	1.00	2	45	2	4	0	0
Walnut	20832	0	0	0	2	1	1.00	2	24	1	5	0	0
Jasper	20917	1	1	0	1	1	3.00	2	52	2	1	1	0
Merle	20974	0	0	0	1	1	1.00	2	33	2	4	0	0
Cassidy	20996	1	2	0	1	0	0.67	1			5	0	1
Honey	21772	0	0	1	2	0	9.00	3	84	3	1	0	0
Willa	21138	0	0	0	1	0	2.00	2	41	2	5	0	0
Mochi	22202	1	2	1	1	1	10.00	3	18	1	1	1	0
Dani	22007	0	0	1	2	0	3.00	2	60	3	1	0	0
Nikov	22195	1	2	1	1	1	10.00	3	70	3	1	1	1
Gus Gus	21530	0	0	1	1	1	3.00	2	71	3	5	0	0
Chocolate	22220	1	1	1	1	1	2.00	2	16.2	1	1	0	1
Jimmy Carter	21347	0	0	0	1	1	4.00	2	71	3	4	0	0
Buck	21755	1	1	1	2	1	5.00	2	60	3	1	1	0
Burger	23003	1	2	1	1	1	5.00	2	69.8	3	1	1	1
Miss Norbury	21574	1	2	0	1	0	6.00	2	49.6	2	4	1	1
Bucky	22198	0	0	1	2	1	4.00	2	65.6	3	1	0	0
Chorey	21644	1	1	0	2	1	6.00	2	13	1	5	1	0
Holly	21653	1	1	0	2	0	3.00	2	38.8	2	1	0	1
Kira Belle	21853	0	0	1	1	0	1.00	2	28	2	4	0	0
Kringle	21801	1	1	0	1	1	3.00	2	37	2	3	1	0
Anastasia	21709	0	0	0	1	0	2.00	2	52	2	4	0	0
Princess	21789	0	0	0	1	0	5.00	2	38	2	1	0	0
Nala	21922	0	0	0	2	0	0.42	1			1	0	0
Andie	22019	0	0	1	1	0	2.00	2	36	2	1	0	0
Bella	21944	1	1	0	1	0	0.58	1			1	0	1
Tag	22081	0	0	1	1	1	0.58	1			5	0	0
Patrick	21964	0	0	0	1	1	0.50	1			5	0	0
JoJo	21972	1	1	0	1	0	5.00	2	15.2	1	1	0	1
Ruben	21996	0	0	1	1	1	2.00	2	62	3	4	0	0
Billy	22004	0	0	0	2	1	7.00	2	72	3	5	0	0
Sally Yates	22005	0	0	0	2	0	6.00	2	15.6	1	5	0	0
Laci	22087	0	0	1	2	0	2.00	2	32	2	5	0	0
Jacalyn	22050	0	0	1	1	0	0.67	1			5	0	0
Sparkle	22035	0	0	0	1	0	0.42	1			5	0	0
Greta	22036	1	1	0	2	0	8.00	3	87	3	5	1	0
Purdy	22040	0	0	0	1	0	0.67	1			1	0	0
Jax	22098	0	0	0	1	1	0.50	1			1	0	0
Huey	22127	0	0	0	1	1	9.00	3	12	1	5	0	0
Pippi	22144	0	0	0	1	0	0.67	1			1	0	0
Kylo	22233	0	0	0	1	1	1.00	2	52	2	1	0	0
Riley	22244	0	0	0	2	1	7.00	2	25	2	1	0	0
Jack	22245	1	1	0	2	1	8.00	3	18	1	1	0	1
Teddy	22318	1	1	0	2	1	10.00	3	34.2	2	1	1	1
Junior	22524	1	1	1	1	1	2.00	2	21	1	1	1	0
Wesley	22353	1	1	0	2	1	4.00	2	21.4	1	5	1	0
Sully	22354	0	0	0	1	1	3.00	2	60	3	1	0	0
Buster	22431	0	0	0	1	1	1.00	2	40	2	3	0	0
Rutherford	22501	0	0	0	1	1	2.00	2	40	2	4	0	0
Cody	22573	0	0	0	2	1	3.00	2	67	3	1	0	0
Athena	22575	1	1	0	2	0	4.00	2	66	3	1	1	0
Gypsy	22582	1	1	0	2	0	4.00	2	27.6	2	1	1	0
Lucy	22724	0	0	0	1	0	1.00	2	16.6	1	1	0	0
Shep	22738	1	1	0	1	1	4.00	2	45	2	4	0	1
Franklin	22755	1	1	0	1	1	6.00	2	11.3	1	5	1	0
Saoirse	22792	0	0	0	1	0	8.00	3	15	1	4	0	0
Kita	22771	0	0	0	2	0	2.00	2	37.6	2	1	0	0
Bailey	22899	0	0	0	2	1	2.00	2	31	2	1	0	0
Molly	22988	1	1	0	2	0	3.00	2	67.8	3	1	1	0
Elsie	23014	0	0	0	1	0	2.00	2	23	1	1	0	0
Marty	17425	1	1	0	1	1	6.00	2	24.4	1	1	1	0
Maggie	17200	1	1	0	1	0	3.00	2	10.2	1	1	1	0
Jake	17203	0	0	0	1	1	2.00	2	13	1	1	0	0
Roxie	17204	0	0	0	1	0	2.00	2	8.2	1	1	0	0
Bruno	17201	0	0	0	1	1	3.08	2	12.2	1	1	0	0
Sebastian	17205	1	1	0	2	1	5.00	2	95	3	1	1	0
Gialla	17206	0	0	0	1	0	5.00	2	80	3	1	0	0
Sven	17473	0	0	0	1	1	0.17	0			1	0	0
Kristoff	17476	0	0	0	1	1	0.17	0			1	0	0
Hershey	17477	0	0	0	1	1	0.17	0			1	0	0
Ana	17478	0	0	0	1	0	0.17	0			1	0	0
Matilda	17524	1	1	0	2	0	4.00	2	28	2	1	1	0
Muffin	17533	0	0	0	2	0	3.00	2	19	1	1	0	0
Elsa	17572	0	0	0	1	0	1.50	2	37	2	1	0	0
Ana	17573	0	0	0	1	0	1.50	2	40	2	1	0	0
Daisy	17592	0	0	0	2	0	3.50	2	66	3	1	0	0
Buddy	17617	0	0	0	2	1	0.75	1			1	0	0
Rambo	17627	0	0	0	1	1	0.50	1			1	0	0
Jewel	17640	0	0	0	2	0	1.00	2	54	2	1	0	0
Sadie	17677	0	0	0	2	0	8.00	3	45	2	1	0	0
Chloe	17678	0	0	0	2	0	1.00	2	59	3	1	0	0
Smitty	17700	0	0	0	1	1	0.33	1			1	0	0
Teddy	17712	0	0	0	2	1	13.00	3	10	1	1	0	0
Duke	17727	0	0	0	1	1	10.00	3	55	3	1	0	0
Brutus	17732	0	0	0	1	1	4.00	2	91	3	1	0	0
Chloe	17737	0	0	0	2	0	5.00	2	10.4	1	1	0	0
Charlotte	22061	0	0	1	1	0	1.00	2	62	3	1	0	0
Bubba	17789	0	0	0	1	1	6.00	2	38	2	1	0	0
Jack	17820	0	0	0	1	1	3.00	2	115	3	1	0	0
Daisy	17838	0	0	0	2	0	8.00	3	63	3	1	0	0
Maybeline	17860	0	0	0	1	0	0.33	1			1	0	0
Parker	17882	0	0	0	2	0	1.50	2	49	2	1	0	0
Sunshine	17899	0	0	0	2	0	8.00	3	57.4	3	1	0	0
Lilly Bell	17900	0	0	0	2	0	8.00	3	16	1	1	0	0
Lexi	17901	0	0	0	1	0	8.00	3	11.14	1	1	0	0
Bell	17902	0	0	0	1	0	7.00	2	10.6	1	1	0	0
Tinker	17903	0	0	0	1	0	7.00	2	4.85	1	1	0	0
Gillian	17926	0	0	0	1	0	2.00	2	9.8	1	1	0	0
Josephine	17927	0	0	0	1	0	4.00	2	7	1	1	0	0
Rocky	17930	0	0	0	2	1	6.00	2	31.4	2	1	0	0
Bandit	17945	0	0	0	1	1	0.42	1			1	0	0
Sophie	17987	0	0	0	1	0	2.00	2	51	2	1	0	0
Harriett	18006	0	0	0	2	0	13.00	3	85	3	1	0	0
Daisy	20671	0	0	1	1	0	0.17	0			1	0	0
Daisy	18017	0	0	0	1	0	1.00	2	52	2	1	0	0
Jean Luc	18029	1	1	0	1	1	2.00	2	40.2	2	1	1	0
Oatmeal	18032	0	0	0	1	1	0.17	0			1	0	0
Dexter	18049	0	0	0	1	1	6.00	2	109	3	1	0	0
Sabrina	18085	0	0	0	1	0	6.00	2	54	2	1	0	0
Pip	18106	0	0	0	1	1	0.25	0			1	0	0
Frankie	18107	0	0	0	1	1	0.25	0			1	0	0
Milo	18108	0	0	0	1	1	0.25	0			1	0	0
Izzy	18382	0	0	1	2	0	6.75	2	60	3	1	0	0
Casper	18195	0	0	0	1	1	3.00	2	10.6	1	1	0	0
Leo	18227	0	0	0	1	1	0.21	0			1	0	0
Poppy	18228	0	0	0	1	0	0.21	0			1	0	0
Delilah	18236	0	0	0	1	0	1.00	2	44	2	1	0	0
Charles	18244	0	0	0	2	1	4.00	2	35	2	1	0	0
Daisy	18245	0	0	0	1	0	4.00	2	13.6	1	1	0	0
Pansy	18316	0	0	1	1	0	5.00	2	9.8	1	1	0	0
Fred	18475	0	0	1	1	1	3.00	2	18.4	1	5	0	0
Dozer	18291	0	0	0	1	1	1.00	2	49	2	1	0	0
Terry	18293	0	0	0	1	1	0.13	0			1	0	0
Tasha	18294	0	0	0	1	0	0.13	0			1	0	0
Sunny	18295	0	0	0	1	0	0.13	0			1	0	0
Shayla	18296	0	0	0	1	0	0.13	0			1	0	0
Willie	18297	0	0	0	1	1	0.13	0			1	0	0
Ray	18298	0	0	0	1	1	0.13	0			1	0	0
Pudge	18299	0	0	0	1	1	0.13	0			1	0	0
Huck	18300	0	0	0	1	1	0.13	0			1	0	0
Ollie	18301	0	0	0	1	1	0.13	0			1	0	0
Harley	18302	0	0	0	1	1	0.13	0			1	0	0
Buddy	18303	0	0	0	1	1	0.13	0			1	0	0
Gracie	18304	0	0	0	1	0	0.67	1			1	0	0
Kesey	20271	0	0	1	2	1	1.00	2	50	2	1	0	0
Jep	18375	0	0	0	2	1	1.00	2	68	3	1	0	0
Greg	18374	0	0	0	2	1	0.67	1			1	0	0
Gracie	18390	0	0	0	2	0	12.00	3	24	1	1	0	0
Lou	18394	0	0	0	2	1	0.25	0			1	0	0
Pugsly	18395	0	0	0	2	1	1.00	2	32	2	1	0	0
Marley	18405	0	0	0	1	1	11.00	3	9.9	1	1	0	0
King	18431	0	0	0	1	1	7.00	2	18	1	1	0	0
Bugger	18432	0	0	0	1	1	4.00	2	14.8	1	1	0	0
Bo	18441	0	0	0	2	1	2.00	2	51	2	1	0	0
George	18450	0	0	0	1	1	1.00	2	53.8	2	1	0	0
Bella	18498	0	0	0	2	0	1.00	2	10.6	1	1	0	0
Keeba	18538	0	0	0	2	1	9.00	3	33	2	1	0	0
Allie	18596	0	0	0	2	0	9.00	3	48	2	1	0	0
Princess Jewel	18632	0	0	0	1	0	8.00	3	73	3	1	0	0
Avery	18913	0	0	1	1	1	1.00	2	85	3	1	0	0
Willow Louise	18761	0	0	0	2	0	3.00	2	49	2	1	0	0
Gizmo	18818	0	0	0	2	1	11.00	3	14.2	1	1	0	0
Dora	18851	1	1	0	1	0	4.00	2	15.4	1	1	1	0
Samson	18853	0	0	0	2	1	4.00	2	117	3	1	0	0
Murray	18956	0	0	0	1	1	1.00	2	10.6	1	1	0	0
General	19081	0	0	0	1	1	8.00	3	35	2	1	0	0
Bubba	19266	0	0	0	1	1	2.00	2	76	3	1	0	0
Ralph	17693	0	0	0	1	1	2.00	2	75	3	5	0	0
Rosemary	17755	0	0	0	2	0	5.00	2	7.9	1	5	0	0
Matilda	17756	0	0	0	2	0	5.00	2	8.35	1	5	0	0
Sheila Xena	17757	1	1	0	2	0	3.00	2	7.3	1	5	1	0
Skittles	17758	0	0	0	2	0	2.00	2	6.75	1	5	0	0
Cookie	17760	0	0	0	2	0	10.00	3	10.75	1	5	0	0
Sparky Night	17761	1	2	0	2	1	4.00	2	8.7		5	1	0
Josie	17801	0	0	0	1	0	0.17	0			5	0	0
Sweet Dee	17803	0	0	0	1	0	0.17	0			5	0	0
Zoe	17804	0	0	0	1	0	0.17	0			5	0	0
Tucker	17805	0	0	0	1	1	0.17	0			5	0	0
Sarge	17806	0	0	0	1	1	0.17	0			5	0	0
Elsa	17807	0	0	0	1	0	0.17	0			5	0	0
Lola AKA Ana	20806	0	0	1	1	0	0.17	0			5	0	0
Parker	18237	0	0	1	2	1	4.00	2	11.8	1	5	0	0
Eeyore	18021	0	0	0	2	1	2.00	2	10	1	5	0	0
Garfield	18022	0	0	0	2	1	8.00	3	13.4	1	5	0	0
Bilbo	18023	0	0	0	2	1	1.00	2	7.1	1	5	0	0
Ruby	18511	0	0	1	1	0	2.00	2	44	2	5	0	0
Jovie	18035	0	0	0	1	0	3.00	2	34	2	5	0	0
Silas	18036	0	0	0	1	1	2.00	2	61	3	5	0	0
Bonnie	18118	0	0	0	2	0	0.83	1			5	0	0
Taylor	18119	0	0	0	1	1	0.30	0			5	0	0
Dixie	18120	0	0	0	1	0	2.00	2	28.8	2	5	0	0
Harper	18121	0	0	0	1	0	0.30	0			5	0	0
Aubie	18122	0	0	0	1	0	0.30	0			5	0	0
Ranger	18123	0	0	0	1	1	2.00	2	20.4	1	5	0	0
Lucky	18124	0	0	0	1	1	0.30	0			5	0	0
Maggie Mae	18125	0	0	0	1	0	2.00	2	57	3	5	0	0
Joe	18129	0	0	0	1	1	1.00	2	60	3	5	0	0
Skye	18126	0	0	0	1	0	1.00	2	46.6	2	5	0	0
Creede	18127	0	0	0	1	0	2.00	2	53.2	2	5	0	0
Joe DiMaggio	18191	0	0	0	2	1	6.00	2	12.5	1	5	0	0
Vincent	18336	0	0	0	1	1	0.25	0			5	0	0
Vernon	18337	0	0	0	1	1	0.25	0			5	0	0
Victor	18338	0	0	0	1	1	0.25	0			5	0	0
Mae	18341	0	0	0	1	0	0.83	1			5	0	0
Ellie	18342	0	0	0	1	0	0.83	1			5	0	0
Jack	18602	0	0	1	2	1	5.00	2	56.8	3	5	0	0
Lily	18464	0	0	0	1	0	0.17	0			5	0	0
Harriet	18467	0	0	0	1	0	0.17	0			5	0	0
Harold	18469	0	0	0	1	0	0.17	0			5	0	0
Saunders Marie	18468	0	0	0	1	0	0.17	0			5	0	0
Sissy	18465	0	0	0	1	0	0.17	0			5	0	0
Mindy	18466	0	0	0	1	0	0.17	0			5	0	0
Blaze	18470	0	0	0	1	1	0.17	0			5	0	0
Dolly	18813	0	0	0	1	0	2.00	2	25	2	5	0	0
Gerty	18922	0	0	0	2	0	10.00	3	43	2	5	0	0
Destin	18923	0	0	0	1	1	0.17	0			5	0	0
Harbor	18924	0	0	0	1	0	0.17	0			5	0	0
Ron Weasley	19001	0	0	0	1	1	0.17	0			5	0	0
Harry Potter	19002	0	0	0	1	1	0.17	0			5	0	0
Buddy	19003	0	0	0	1	1	0.50	1			5	0	0
Molly	19049	1	1	0	2	0	12.00	3	22	1	5	1	0
Addie	19178	0	0	1	2	0	0.50	1			5	0	0
Rebel	19097	0	0	0	2	0	0.50	1			5	0	0
Otis	19098	0	0	0	1	1	0.17	0			5	0	0
Walker	19099	0	0	0	1	1	0.25	0			5	0	0
Tonka	19139	0	0	0	2	1	0.67	1			5	0	0
Eclipse	19140	0	0	0	1	1	0.30	0			5	0	0
Twilight	19141	0	0	0	1	0	0.30	0			5	0	0
Samantha	19183	0	0	0	2	0	0.50	1			5	0	0
Bailey	18577	1	2	1	2	0	5.00	2	14	1	1	1	0
Lee Lee	18396	0	0	1	1	0	3.00	2	57	3	1	0	0
Tatiana	18133	0	0	1	1	0	2.00	2	63	3	4	0	0
Buddy	18839	0	0	1	2	1	9.00	3	16	1	missing	0	0
Blake	17235	0	0	0	1	1	2.00	2	52	2	4	0	0
Miel	17349	0	0	0	1	0	5.00	2	48	2	4	0	0
Tina	17395	0	0	0	1	0	2.00	2	17.4	1	4	0	0
Lavender	17410	0	0	0	1	0	0.50	1			4	0	0
Sasha	17642	0	0	0	1	0	2.00	2	58	3	4	0	0
Jack	17799	0	0	0	1	1	2.00	2	55	3	4	0	0
Jax	17198	0	0	0	2	1	1.00	2	52.8	2	1	0	0
Mina	17846	0	0	0	1	0	2.00	2	41	2	4	0	0
Micky	17951	0	0	0	1	1	1.00	2	23	1	4	0	0
Fiona	19677	0	0	1	1	0	2.00	2	54	2	4	0	0
Edith	18392	1	1	0	1	0	6.00	2	28.4	2	4	1	0
Luis	18445	0	0	0	1	1	4.00	2	80	3	4	0	0
Glenda	18496	0	0	0	1	0	6.00	2	54	2	4	0	0
Sunny	18603	1	1	0	1	1	3.00	2	13	1	4	1	0
Edward	18799	0	0	0	1	1	10.00	3	95	3	4	0	0
Kayla	18857	0	0	0	2	0	1.00	2	37	2	4	0	0
Anabelle	18892	0	0	0	1	0	3.00	2	62	3	4	0	0
Mr Beefy	19102	0	0	0	2	1	1.00	2	60	3	4	0	0
Patty Mayonnaise	19036	1	1	0	1	0	3.00	2	16	1	4	1	0
Justice	19291	0	0	0	1	0	2.00	2	73.2	3	1	0	0
Rocky	20915	0	0	1	1	1	7.00	2	13	1	1	0	0
Roxie	19305	0	0	0	1	0	0.50	1			1	0	0
Bodie	19323	0	0	0	2	1	4.00	2	11.8	1	1	0	0
Bruiser	19388	0	0	0	1	1	7.92	2	8.7	1	1	0	0
Buddy	19390	0	0	0	2	1	11.00	3	28	2	1	0	0
Molly	19464	0	0	0	2	0	10.00	3	19.2	1	1	0	0
Hunter	19772	0	0	1	1	1	5.92	2	60	3	1	0	0
Finn	19487	0	0	0	1	1	1.92	2	51.8	2	1	0	0
Foxie	19545	0	0	0	2	0	11.00	3	25.8	2	1	0	0
Charlie	19565	0	0	0	1	1	0.83	1			1	0	0
Lewie	19573	0	0	0	2	1	5.00	2	70	3	1	0	0
Stout	19617	0	0	0	1	1	0.17	0			1	0	0
Luke	19625	0	0	0	1	1	0.08	0			1	0	0
Ashton	19626	0	0	0	1	1	0.08	0			1	0	0
Calum	19627	0	0	0	1	1	0.08	0			1	0	0
Clifford	19628	0	0	0	1	1	0.08	0			1	0	0
Liam	19629	0	0	0	1	1	0.08	0			1	0	0
Pepper	19642	1	1	0	2	1	1.00	2	51.4	2	1	1	0
Malakai	19679	0	0	1	1	1	2.00	2	107	3	1	0	0
Bristol	19682	0	0	0	2	0	1.00	2	44	2	1	0	0
Izzi	19700	0	0	0	1	0	7.00	2	74	3	1	0	0
Eamon	19746	0	0	0	1	1	2.00	2	126	3	3	0	0
Declan	19748	0	0	0	1	1	3.00	2	41	2	3	0	0
Ezra	19750	0	0	0	1	1	0.25	0			3	0	0
Siobhan	19752	1	1	0	1	0	8.00	3	11.4	1	3	1	0
Andre	19753	0	0	0	1	1	0.25	0			3	0	0
Seamus	19755	0	0	0	1	1	3.00	2	54	2	3	0	0
Patrick	19757	0	0	0	1	1	0.08	0			3	0	0
Jessalyn	19758	0	0	0	2	0	1.00	2	8	1	3	0	0
Ciroc	19797	0	0	0	2	1	3.00	2	35.6	2	3	0	0
Nae Nae	19833	0	0	0	1	0	2.00	2	46.8	2	3	0	0
Jackson	19814	0	0	0	1	1	1.92	2	19	1	1	0	0
Chloe	19836	0	0	0	1	0	0.83	1			1	0	0
Remi	19937	0	0	1	1	1	0.58	1			1	0	0
Sheba	20066	0	0	1	2	0	9.00	3	48	2	1	0	0
Buddy	19871	0	0	0	2	1	11.00	3	110	3	1	0	0
Peanut	19881	0	0	0	1	0	1.92	2	24.6	1	1	0	0
Sophie	21060	0	0	1	2	0	8.00	3	67	3	1	0	0
Willow	20189	0	0	1	2	0	4.00	2	51	2	1	0	0
Miley	19975	0	0	0	1	0	7.75	2	19	1	1	0	0
Jax	19976	0	0	0	1	1	0.17	0			1	0	0
Bella	19978	0	0	0	2	0	5.92	2	102	3	1	0	0
Steely Dan	19992	0	0	0	2	1	1.00	2	57	3	1	0	0
Diamond	19993	0	0	0	2	0	1.00	2	55	3	1	0	0
Buster	20007	0	0	0	2	1	7.00	2	16.8	1	1	0	0
Molly	20006	1	1	0	2	0	7.00	2	21	1	1	1	0
Brownie	20000	0	0	0	1	1	2.00	2	54	2	1	0	0
K C	20089	0	0	0	1	1	3.00	2	35	2	1	0	0
Diesel	20117	0	0	0	1	1	2.00	2	50	2	1	0	0
Lucas	20153	0	0	0	1	1	0.75	1			1	0	0
Rudy	20311	1	2	1	2	1	6.00	2	50	2	1	1	0
Scotch	20169	0	0	0	1	0	8.00	3	53	2	1	0	0
Rocky	20190	0	0	0	2	1	0.42	1			1	0	0
Maddie	20193	0	0	0	1	0	4.00	2	76	3	1	0	0
Midnight	20203	0	0	0	1	0	4.00	2	54	2	1	0	0
Albert	20204	0	0	0	1	1	0.42	1			1	0	0
Snoopy	20209	0	0	0	2	1	6.00	2	50	2	1	0	0
Rex	20510	1	1	1	1	1	3.00	2	120	3	1	1	0
Rusty	20222	0	0	0	2	1	2.50	2	9.4	1	1	0	0
Kayto	20244	0	0	0	2	1	11.00	3	56	3	1	0	0
Lulu	20329	0	0	0	2	0	8.00	3	55	2	1	0	0
Havana	20355	0	0	0	2	0	6.00	2	79	3	1	0	0
Webster	20362	0	0	0	2	1	2.00	2	73	3	1	0	0
LuLu	20367	0	0	0	2	0	14.00	3	22.4	1	1	0	0
Tank	20381	0	0	0	1	1	1.00	2	53	2	1	0	0
Tessa	20490	0	0	0	1	0	1.50	2	12.8	1	1	0	0
Olive	20588	0	0	0	2	0	4.00	2	51	2	1	0	0
Sophia	20597	0	0	0	2	0	7.92	2	10.2	1	1	0	0
Griffin	20781	0	0	0	1	1	1.00	2	23	1	3	0	0
Oscar	20744	0	0	0	2	1	4.00	2	90	3	1	0	0
Smokey	21056	0	0	1	2	1	4.00	2	16.8	1	1	0	0
Aphrodite	20772	0	0	0	1	0	1.50	2	55	2	1	0	0
Milo	20784	0	0	0	2	1	2.00	2	76	3	1	0	0
Chloe	20789	0	0	0	2	0	8.00	3	60	3	1	0	0
Sara	20836	0	0	0	2	0	9.50	3	66	3	1	0	0
Trigger	20905	0	0	0	1	1	0.75	1			1	0	0
Clover	21002	0	0	0	2	0	7.00	2	9	1	1	0	0
Daisy	21007	0	0	0	1	0	3.00	2	10	1	1	0	0
Buffy	21024	0	0	0	1	0	0.75	1			1	0	0
Hadley	21033	0	0	0	2	1	8.00	3	56	3	1	0	0
Bella	21041	0	0	0	2	0	3.00	2	47	2	1	0	0
Rex	21071	1	1	0	2	1	4.00	2	145	3	1	1	0
Tori	21072	0	0	0	2	0	4.00	2	88	3	1	0	0
Athena	21078	0	0	0	1	0	0.50	1			1	0	0
Spice	21154	0	0	0	1	0	0.17	0			1	0	0
Sugar	21155	0	0	0	1	0	0.17	0			1	0	0
Winnie	21156	0	0	0	1	0	0.17	0			1	0	0
Cayenne	21161	0	0	0	2	0	6.00	2	16.4	1	1	0	0
Presto	22636	0	0	1	2	1	10.00	3	68	3	1	0	0
Stanley	20747	0	0	1	2	1	4.17	2	68	3	1	0	0
Frodo	20472	0	0	1	2	1	2.33	2	23	1	1	0	0
Shane	20214	0	0	1	1	1	2.00	2	80	3	1	0	0
Spot	19400	1	1	1	2	1	3.42	2	19	1	3	1	0
Lucy AKA June	20262	0	0	1	1	0	4.42	2	41.8	2	4	0	0
Cameron	19589	0	0	1	1	0	2.00	2	64.6	3	4	0	0
Johnny	19563	0	0	1	2	1	7.92	2	65.4	3	4	0	0
Zoe AKA Penny	20057	0	0	1	1	0	0.42	1			5	0	0
Cali	19598	0	0	1	1	0	1.42	2	39.6	2	5	0	0
Alice	19960	0	0	1	1	0	5.42	2	66.4	3	4	0	0
Sweety	21177	0	0	1	2	0	3.42	2	50	2	5	0	0
Coal	20125	0	0	1	1	1	0.08	0			5	0	0
Gus	20637	0	0	1	1	1	0.08	0			5	0	0
Snoopy	20133	0	0	1	1	1	0.17	0			5	0	0
Peanut	20436	0	0	1	2	1	3.00	2	42.1	2	5	0	0
Toto	20804	0	0	1	2	1	0.67	1			5	0	0
Armando	20921	0	0	1	1	1	2.00	2	62	3	5	0	0
Jessi	20881	0	0	1	2	0	2.92	2	20	1	5	0	0
Tatum	20998	0	0	1	1	0	1.00	2	35.4	2	5	0	0
Louise	21025	0	0	1	1	0	0.17	0			5	0	0
Herman	19307	0	0	0	1	1	2.92	2	15.04	1	4	0	0
Paddington	19433	0	0	0	1	1	1.92	2	80	3	4	0	0
Turk	19476	0	0	0	2	1	3.42	2	73	3	4	0	0
Isabella	19567	0	0	0	1	0	1.92	2	20.2	1	4	0	0
Marshall	19681	0	0	0	1	1	2.00	2	65	3	4	0	0
Miche	19698	0	0	0	2	0	6.00	2	55	3	4	0	0
Ruger	19816	0	0	0	2	1	2.92	2	31.4	2	4	0	0
Marty	19910	0	0	0	1	1	8.92	3	63	3	4	0	0
Maizy	19968	1	2	0	1	0	10.08	3	40	2	4	0	1
Marley	20081	0	0	0	1	1	2.00	2	13.6	1	4	0	0
Alastor	20149	0	0	0	1	1	1.92	2	60	3	4	0	0
Davinci	20199	0	0	0	1	1	2.00	2	82	3	4	0	0
Claire	20379	0	0	0	1	0	2.92	2	31	2	4	0	0
Kelsey	20431	0	0	0	2	0	1.00	2	44	2	4	0	0
Avy	22536	0	0	1	1	0	1.00	2	38.4	2	4	0	0
Forest	20577	0	0	0	1	1	1.00	2	80.8	3	4	0	0
Caitlin	20644	0	0	0	1	0	2.00	2	20.6	1	4	0	0
Harmony	20721	0	0	0	1	0	4.00	2	19	1	4	0	0
Shelby	20790	0	0	0	2	0	1.60	2	50	2	4	0	0
Lila	20798	1	1	0	1	0	1.00	2	44.8	2	4	1	0
Doyle	20803	1	1	0	1	1	2.00	2	20	1	4	1	0
Gandalf	20811	0	0	0	2	1	9.92	3	20.4	1	4	0	0
Bo Jangles	20894	1	2	0	1	1	1.00	2	18.4	1	4	1	0
Bowser	21179	0	0	0	2	1	2.00	2	63.5	3	4	0	0
Bear	19325	0	0	0	1	1	0.67	1			5	0	0
Kisses	19415	0	0	0	1	1	0.17	0			5	0	0
Donnie	19502	0	0	0	2	1	5.00	2	47	2	5	0	0
Jace	19503	1	1	0	1	1	0.67	1			5	1	0
Rain	19504	0	0	0	1	0	0.58	1			5	0	0
Storm	19505	0	0	0	1	0	0.58	1			5	0	0
Sweet Pea	19739	0	0	0	1	0	0.33	1			5	0	0
Rum	19902	0	0	0	2	0	1.00	2	23	1	5	0	0
Gin	19903	0	0	0	2	0	1.00	2	15	1	5	0	0
Levi	19904	0	0	0	1	1	7.00	2	47	2	5	0	0
London	19907	0	0	0	1	1	0.17	0			5	0	0
Fletcher	19906	0	0	0	1	1	0.17	0			5	0	0
Halsey	19908	0	0	0	1	1	0.17	0			5	0	0
Shay	19909	0	0	0	1	0	0.17	0			5	0	0
Scrappy Doo	19958	0	0	0	2	1	1.50	2	16.2	1	5	0	0
Prissy	19962	0	0	0	2	0	2.00	2	39.8	2	5	0	0
Gizelle	20017	0	0	0	1	0	1.00	2	35	2	5	0	0
Bryant	20016	0	0	0	1	1	1.50	2	74.8	3	5	0	0
Faith	20009	0	0	0	1	0	1.00	2	30	2	5	0	0
Sable	20010	0	0	0	1	0	0.08	0			5	0	0
General	20013	0	0	0	1	1	0.08	0			5	0	0
Lucas	20014	0	0	0	1	1	0.08	0			5	0	0
Liam	20015	0	0	0	1	1	0.08	0			5	0	0
Clementine	20042	0	0	0	1	0	0.17	0			5	0	0
Rudy	20043	0	0	0	1	1	0.25	0			5	0	0
Greer	20044	0	0	0	1	1	1.50	2	42	2	5	0	0
Avery	20075	0	0	0	1	0	0.50	1			5	0	0
Thistle	20077	0	0	0	1	1	0.50	1			5	0	0
Sophie	20073	0	0	0	1	0	4.00	2	25.4	2	5	0	0
Betsy	20092	0	0	0	1	0	0.25	0			5	0	0
Bessie	20093	0	0	0	1	0	0.25	0			5	0	0
Blake	20094	0	0	0	1	1	0.25	0			5	0	0
Becca	20095	0	0	0	1	0	0.25	0			5	0	0
Sully	20144	0	0	0	2	1	0.83	1			5	0	0
Maddie	20145	0	0	0	1	0	0.50	1			5	0	0
Abby	21309	0	0	1	2	0	5.00	2	46	2	5	0	0
Bindi	20175	0	0	0	1	0	0.25	0			5	0	0
Reba	20176	0	0	0	1	0	0.25	0			5	0	0
Aubrey	20177	0	0	0	1	0	0.25	0			5	0	0
Dolly	20178	0	0	0	1	0	0.25	0			5	0	0
Taylor	20179	0	0	0	1	0	0.25	0			5	0	0
Sammy	20247	0	0	0	2	1	1.58	2	47	2	5	0	0
Robbie	20266	0	0	0	1	1	0.75	1			5	0	0
Casey	20279	0	0	0	2	0	2.00	2	65	3	5	0	0
Hank	20280	0	0	0	2	1	10.00	3	59	3	5	0	0
Juni	20290	0	0	0	1	1	0.17	0			5	0	0
Shia	20291	0	0	0	1	0	0.17	0			5	0	0
Tux	20292	0	0	0	1	1	0.17	0			5	0	0
Harvey	20304	0	0	0	1	1	2.00	2	65	3	5	0	0
Elvis	20316	0	0	0	2	1	7.00	2	74.6	3	5	0	0
Kammie	20321	0	0	0	1	0	0.33	1			5	0	0
Sadie	20320	0	0	0	2	0	2.50	2	32	2	5	0	0
Bert	20341	1	1	0	2	1	6.00	2	69	3	5	1	0
Moe	20343	0	0	0	2	1	2.00	2	45	2	5	0	0
Curly	20344	0	0	0	2	1	2.00	2	54	2	5	0	0
Ellie	20370	0	0	0	2	0	1.00	2	48.8	2	5	0	0
Zeva	20417	0	0	0	2	0	3.00	2	38	2	5	0	0
Nikita	20418	0	0	0	1	0	1.92	2	59	3	5	0	0
Pistol	20420	0	0	0	1	1	0.42	1			5	0	0
Heidi	20421	0	0	0	1	0	3.00	2	39.8	2	5	0	0
Buckley	20560	0	0	0	2	1	2.00	2	21.6	1	5	0	0
Bridget	20561	0	0	0	2	0	0.50	1			5	0	0
Princess Leia	20606	0	0	0	1	0	2.00	2	37	2	5	0	0
Jane	20608	0	0	0	1	0	1.00	2	47	2	5	0	0
Ally	20609	0	0	0	1	0	1.00	2	37.4	2	5	0	0
Camilla	20611	0	0	0	1	0	1.00	2	37	2	5	0	0
Buster	20708	0	0	0	2	1	2.50	2	47	2	5	0	0
Buddy	20709	0	0	0	2	1	2.50	2	56	3	5	0	0
Andy	20740	0	0	0	2	1	3.00	2	56	3	5	0	0
CoCo	20741	0	0	0	2	1	7.00	2	26	2	5	0	0
Freckles	20827	0	0	0	1	0	0.50	1			5	0	0
Hope	20828	0	0	0	2	0	0.25	0			5	0	0
Faith	20829	0	0	0	1	0	2.00	2	50	2	5	0	0
Coola	20831	1	1	0	2	1	3.50	2	7.6	1	5	1	0
Luke	20884	0	0	0	2	1	1.00	2	37	2	5	0	0
Vader	20885	0	0	0	2	1	0.58	1			5	0	0
Aspen	20886	0	0	0	2	0	1.50	2	50	2	5	0	0
Pirate	20887	0	0	0	1	1	0.25	0			5	0	0
Prancer	20888	0	0	0	1	0	0.25	0			5	0	0
Claire	20889	0	0	0	1	0	0.25	0			5	0	0
Peach	20890	0	0	0	1	0	0.25	0			5	0	0
Ralph	20891	0	0	0	1	1	0.25	0			5	0	0
Ivy	20893	0	0	0	1	0	0.25	0			5	0	0
Copper	20970	0	0	0	1	1	1.00	2	52	2	5	0	0
Buster	20993	0	0	0	1	1	3.00	2	38	2	5	0	0
Henry	20994	0	0	0	1	1	2.00	2	6.8	1	5	0	0
Emmy	20995	0	0	0	1	0	0.33	1			5	0	0
Dotti	20997	0	0	0	1	0	0.33	1			5	0	0
Chubbers	21577	0	0	1	2	1	8.00	3	60	3	5	0	0
Vinny	21109	0	0	0	2	1	2.00	2	28	2	5	0	0
Noodles	21137	0	0	0	2	0	0.17	0			5	0	0
Bama	21139	0	0	0	1	0	0.17	0			5	0	0
Grandpa	21140	0	0	0	1	1	0.17	0			5	0	0
Petey	21141	0	0	0	1	0	0.17	0			5	0	0
Basil	21142	0	0	0	1	0	0.17	0			5	0	0
Maxim	21143	0	0	0	1	1	0.17	0			5	0	0
Floppy	21144	0	0	0	1	1	0.17	0			5	0	0
Snugglebuns	21145	0	0	0	1	1	0.17	0			5	0	0
Mason	21146	0	0	0	1	1	0.17	0			5	0	0
Moonpie	21147	0	0	0	1	0	0.17	0			5	0	0
Pip	21148	0	0	0	1	0	0.17	0			5	0	0
Roscoe	21149	0	0	0	1	1	0.25	0			5	0	0
Nala	21922	0	0	0	2	0	0.42	1			1	0	0
Bella	21258	0	0	0	2	0	1.50	2	53	2	1	0	0
Bridget	21271	0	0	0	1	0	3.50	2	21	1	1	0	0
Major	21331	0	0	0	1	1	2.50	2	70	3	1	0	0
Louanne	21346	0	0	0	1	0	4.00	2	30	2	1	0	0
Xenia	21384	1	1	0	1	0	0.42	1			1	1	0
Tequito	21405	0	0	0	2	1	4.00	2	13.6	1	1	0	0
Maggie	21433	0	0	0	1	0	4.00	2	47	2	1	0	0
Rocky aka JR	21434	0	0	0	2	1	10.00	3	45	2	1	0	0
Dee Dee	21492	0	0	0	1	0	0.67	1			1	0	0
Hash Brown	21507	0	0	0	1	0	0.17	0			1	0	0
Julienne	21508	0	0	0	1	0	0.17	0			1	0	0
Home Fry	21509	0	0	0	1	1	0.17	0			1	0	0
French Fry	21510	0	0	0	1	0	0.17	0			1	0	0
Potato	21511	0	0	0	1	0	0.17	0			1	0	0
Tater Tot	21512	0	0	0	1	0	0.17	0			1	0	0
Spud	21513	0	0	0	1	1	0.17	0			1	0	0
Sammy	21609	0	0	0	2	1	8.17	3	44	2	3	0	0
Stella	21675	0	0	1	2	0	0.58	1			1	0	0
Sky	21920	0	0	1	1	0	0.58	1			1	0	0
Hendrix	21708	0	0	0	1	1	1.50	2	81.8	3	3	0	0
Luna	21692	0	0	0	2	0	1.42	2	40	2	1	0	0
Maddy	21770	0	0	0	1	0	0.75	1			1	0	0
Marge	21790	0	0	0	1	0	0.25	0			1	0	0
Carlos	21809	0	0	0	1	1	5.00	2	16	1	1	0	0
Blue	21813	1	2	0	1	1	3.50	2	50	2	1	1	0
Precious	21815	0	0	0	2	0	2.00	2	58	3	1	0	0
August	21997	1	1	1	2	0	8.00	3	71	3	1	1	0
PeeWee	21872	0	0	0	2	1	5.00	2	8.2	1	1	0	0
Buddy	21873	0	0	0	1	1	5.00	2	9.7	1	1	0	0
Mocha	21898	0	0	0	2	1	1.50	2	55	2	1	0	0
Zoe	21906	0	0	0	1	0	0.67	1			1	0	0
Mokie	21942	0	0	0	1	0	1.00	2	4.9	1	1	0	0
Misha	22015	1	1	1	1	1	1.00	2	9.3	1	1	1	0
Bonnie	21956	0	0	0	2	0	11.00	3	16.2	1	1	0	0
Zeebe	21959	0	0	1	2	0	4.00	2	14.2	1	1	0	0
Teddy	21971	0	0	0	2	1	5.50	2	81	3	1	0	0
Heidi	21973	0	0	0	2	0	9.00	3	7.9	1	1	0	0
Jeffy	21974	0	0	0	2	1	9.00	3	15.2	1	1	0	0
Elvis	22045	0	0	1	2	1	4.58	2	18.6	1	1	0	0
Jolie	22008	0	0	0	1	0	8.00	3	15.2	1	1	0	0
Pongo	22080	0	0	1	1	1	0.67	1			1	0	0
Maggie	22042	0	0	0	2	0	1.00	2	55	2	1	0	0
Roper	22056	0	0	0	2	1	8.00	3	42	2	1	0	0
Bruno	22065	0	0	0	1	1	1.00	2	71	3	1	0	0
Dizzy	22068	0	0	0	1	0	9.58	3	43	2	1	0	0
Lily	22092	0	0	0	1	0	5.00	2	92	3	1	0	0
Gopher	22212	0	0	1	2	1	3.00	2	48	2	1	0	0
Peanut	22143	1	2	0	1	1	5.50	2	21.6	1	1	1	0
Fudge	22188	0	0	0	1	1	0.17	0			3	0	0
Emmy	22264	0	0	1	2	0	0.17	0			3	0	0
Smudge	22190	0	0	0	1	1	0.17	0			3	0	0
Talia	22162	0	0	0	2	0	1.00	2	39	2	1	0	0
Rayin	22163	0	0	0	2	0	1.00	2	42	2	1	0	0
Blackie	22196	0	0	0	2	0	10.00	3	77	3	1	0	0
Nala	22209	0	0	0	1	0	2.00	2	31.4	2	1	0	0
Jayde	22213	1	1	0	2	0	8.00	3	21	1	1	1	0
Gizmo	22270	0	0	1	1	1	0.67	1			1	0	0
Raven	22216	0	0	0	1	0	0.33	1			1	0	0
Tex	22251	0	0	0	1	1	0.92	1			1	0	0
Bullet	23840	1	2	1	1	1	2.50	2	53	2	1	1	1
Ryder	22267	0	0	0	1	1	3.00	2	17.4	1	1	0	0
Mellow	22276	0	0	0	1	1	0.75	1			1	0	0
Athena	22309	0	0	0	1	0	1.00	2	57	3	1	0	0
Sydney	22533	0	0	1	1	0	0.25	0			1	0	0
Karma	22337	0	0	0	1	0	1.58	2	45	2	1	0	0
Spanner	22347	0	0	0	2	1	1.50	2	61	3	1	0	0
Jamie	22348	0	0	0	1	0	0.50	1			1	0	0
Barley	22461	0	0	0	2	1	7.00	2	65	3	1	0	0
Ares	22514	0	0	0	1	1	0.67	1			1	0	0
Baelee	22519	0	0	0	1	0	0.75	1			1	0	0
Donte	22522	0	0	0	2	1	12.00	3	10.6	1	1	0	0
Parker	22538	0	0	0	1	1	0.33	1			1	0	0
Miracle	22568	0	0	0	1	0	0.25	0			1	0	0
Roxy	22585	0	0	0	2	0	6.00	2	48	2	1	0	0
Messi	22630	0	0	0	2	1	5.00	2	16.4	1	1	0	0
PJ	22644	0	0	0	2	0	1.00	2	65	3	1	0	0
Bear	22785	0	0	0	1	1	3.00	2	19	1	1	0	0
Cricket	22695	0	0	0	1	1	1.00	2	50	2	1	0	0
Truble	22782	0	0	0	2	1	0.25	0			1	0	0
Krypto	22917	0	0	1	1	1	1.00	2	23.6	1	1	0	0
Dozer	22809	0	0	0	1	1	0.42	1			1	0	0
Angelo	22810	0	0	0	1	1	0.50	1			1	0	0
Rennie	22827	0	0	1	2	1	5.00	2	86	3	1	0	0
Abby	22896	1	1	0	2	0	3.67	2	66	3	1	1	0
Dresden	22989	0	0	0	2	1	1.50	2	45	2	1	0	0
Grayson	23038	0	0	0	1	1	5.00	2	90	3	1	0	0
Harley	23043	1	2	0	2	0	5.00	2	104	3	1	1	1
Star	22201	0	0	1	2	0	10.75	3	71	3	1	0	0
Emmett	21652	0	0	1	2	1	3.75	2	47	2	3	0	0
Chaplin	21427	0	0	1	2	1	5.00	2	69	3	4	0	0
Pippin	22110	0	0	1	1	1	0.75	1			4	0	0
Charlie	21701	0	0	1	1	1	1.00	2	3.8	1	4	0	0
Ellie	21686	0	0	1	2	0	3.00	2	21.4	1	4	0	0
Maverick	22505	0	0	1	2	1	10.08	3	95	3	5	0	0
Jaguar	22076	0	0	1	2	1	2.50	2	52	2	5	0	0
Bella	22970	0	0	1	2	0	1.75	2	59.3	3	4	0	0
Sophie	23056	0	0	1	1	0	2.00	2	67	3	3	0	0
Becca	21279	0	0	0	1	0	0.92	1			4	0	0
Piper	21385	0	0	0	2	0	5.00	2	66.8	3	4	0	0
Merry	21390	0	0	0	2	0	0.75	1			4	0	0
Louie	21391	0	0	0	1	1	0.17	0			4	0	0
McKinley	21569	0	0	0	1	1	5.00	2	50.6	2	4	0	0
Luna	21613	0	0	0	1	0	0.33	1			4	0	0
Ralph	21614	0	0	0	1	1	0.33	1			4	0	0
Trudy	21627	0	0	0	1	0	0.25	0			4	0	0
Twiggy	21825	0	0	0	1	0	3.00	2	20	1	4	0	0
Banjo	22166	0	0	0	2	1	7.00	2	88	3	4	0	0
Bertie	22338	0	0	0	2	1	3.00	2	57	3	4	0	0
Mimsy	22555	0	0	0	1	0	4.92	2	29.2	2	4	0	0
Zeus	22629	0	0	0	1	1	0.33	1			4	0	0
Felicia	22689	0	0	0	2	0	5.92	2	19.8	1	4	0	0
Jack Gibson	22834	1	1	0	1	1	12.92	3	15.4	1	4	1	0
Teddy	23004	0	0	0	1	1	0.21	0			4	0	0
Poindexter	23055	1	1	0	1	1	5.00	2	8.4	1	4	1	0
Sadie	21553	0	0	0	1	0	0.17	0			5	0	0
Bug	21554	0	0	0	1	0	0.17	0			5	0	0
Sasha	21555	0	0	0	1	0	0.17	0			5	0	0
Sammy	21636	0	0	0	1	1	2.00	2	4.5	1	5	0	0
Ruthie	21637	0	0	0	1	0	5.00	2	3.8	1	5	0	0
Cooper	21638	0	0	0	1	1	1.00	2	10	1	5	0	0
Milo	21642	0	0	0	2	1	5.00	2	8.5	1	5	0	0
Thumper	21640	0	0	0	1	1	4.92	2	13.6	1	5	0	0
Jack	21641	0	0	1	1	1	2.00	2	9.5	1	5	0	0
Mini	21643	0	0	0	2	0	6.00	2	7.4	1	5	0	0
Andre	21645	0	0	0	1	1	1.00	2	12	1	5	0	0
Chewy	21965	0	0	0	1	1	2.00	2	24	1	5	0	0
Dutchess	21966	0	0	0	2	0	3.00	2	18.4	1	5	0	0
Ronda	22023	0	0	0	1	0	0.25	0			5	0	0
Mason	22024	0	0	0	1	1	0.25	0			5	0	0
Rhodes	22025	0	0	0	1	1	0.25	0			5	0	0
Maverick	22026	0	0	0	1	1	0.25	0			5	0	0
Leevi	22027	0	0	0	2	0	2.00	2	39	2	5	0	0
Java	22028	0	0	0	1	1	0.50	1			5	0	0
Tyrone	22030	0	0	0	1	1	2.00	2	30	2	5	0	0
Shaba	22031	0	0	0	2	0	2.00	2	21.6	1	5	0	0
Casey	22033	0	0	0	1	1	1.00	2	23	1	5	0	0
Jackson	22034	0	0	0	1	1	0.50	1			5	0	0
Bubba	22048	0	0	0	2	1	3.00	2	60	3	5	0	0
Delta	22075	0	0	0	2	0	13.50	3	5.1	1	5	0	0
Spunky	22125	0	0	0	2	1	5.00	2	14.6	1	5	0	0
Holly	22126	0	0	1	2	0	10.50	3	12.8	1	5	0	0
Buddy	22128	1	1	0	2	1	10.00	3	82	3	5	1	0
Liza	22243	0	0	0	2	0	2.00	2	50	2	5	0	0
Susie	22352	0	0	0	2	0	7.00	2	15.8	1	5	0	0
Duke	22382	0	0	0	1	1	4.58	2	76	3	5	0	0
Gizmo	22446	0	0	0	1	1	0.42	1			5	0	0
Ralph	22447	0	0	0	2	1	2.00	2	24	1	5	0	0
Marcia	22477	0	0	0	1	0	0.17	0			5	0	0
Jan	22478	0	0	0	1	0	0.17	0			5	0	0
Cindy	22479	0	0	0	1	0	0.17	0			5	0	0
Mike	22480	0	0	0	1	1	0.17	0			5	0	0
Greg	22481	0	0	0	1	1	0.17	0			5	0	0
Peter	22482	0	0	0	1	1	0.17	0			5	0	0
Bobby	22483	0	0	0	1	1	0.17	0			5	0	0
Brady	22484	0	0	0	1	1	0.17	0			5	0	0
Charlie	22485	0	0	0	1	1	0.17	0			5	0	0
Dobby	22607	0	0	0	1	1	8.00	3	26	2	5	0	0
Ringer	22608	0	0	0	1	0	0.33	1			5	0	0
Sprout	22609	0	0	0	2	0	4.00	2	4	1	5	0	0
Ginny	22610	0	0	0	1	0	0.33	1			5	0	0
Hermione	22611	0	0	0	1	0	0.67	1			5	0	0
Bonnie	22612	0	0	0	1	0	0.25	0			5	0	0
Clyde	22613	0	0	0	1	1	0.25	0			5	0	0
Minerva	22614	0	0	0	1	0	5.00	2	6.7	1	5	0	0
Porkchop	22615	0	0	0	1	1	2.00	2	29.2	2	5	0	0
Ottmar	22616	0	0	0	2	1	0.42	1			5	0	0
Yoda	22753	0	0	0	2	1	1.50	2	25.4	2	5	0	0
Benjamin Button	22754	0	0	0	1	1	3.00	2	9.6	1	5	0	0
Bonnie	22756	0	0	0	1	0	0.25	0			5	0	0
Clyde	22757	0	0	0	1	1	0.25	0			5	0	0
Bill	22859	0	0	1	2	1	6.50	2	56	3	5	0	0
Sally	22973	0	0	0	1	0	2.00	2	52	2	5	0	0
Reba	22974	0	0	0	1	0	0.06	0			5	0	0
Rosie	22975	0	0	0	1	0	0.06	0			5	0	0
Dyson	22976	0	0	0	1	1	0.06	0			5	0	0
Josh	22977	0	0	0	1	1	0.06	0			5	0	0
Apple	22978	0	0	0	1	1	0.06	0			5	0	0
Dee Dee	22979	0	0	0	1	0	0.06	0			5	0	0
Bailey	22980	0	0	0	1	0	0.06	0			5	0	0
Gemma	22981	0	0	0	1	0	0.06	0			5	0	0
Pam	22982	0	0	0	1	0	0.06	0			5	0	0
Stone	22983	0	0	0	1	1	0.06	0			5	0	0
Shelby	18209	0	0	1	1	0	9.50	3	18.6	1	1	0	0
Buddy	18615	0	0	1	1	1	3.58	2	76	3	1	0	0
Snoopy	18100	0	0	1	2	1	9.67	3	82	3	1	0	0
Roxanne AKA Lulu	18369	0	0	1	1	0	3.17	2	48	2	1	0	0
Esteban AKA Bravo	17412	0	0	1	2	1	3.42	2	18.4	1	5	0	0
Blondie	17127	0	0	0	2	0	3.42	2	60.2	3	1	0	0
Maggie	18265	0	0	1	2	0	7.67	2	22	1	3	0	0
Jacob	17232	0	0	1	2	1	4.92	2	75	3	1	0	0
William	18059	0	0	1	1	1	10.08	3	44	2	4	0	0
Annie	17297	0	0	0	1	0	2.00	2	50	2	4	0	0
Nick	17320	0	0	0	1	1	2.00	2	13	1	4	0	0
Harley	17496	0	0	0	2	1	2.00	2	60	3	4	0	0
Lucas	17896	0	0	0	1	1	2.50	2	13.6	1	4	0	0
August	17921	0	0	0	1	1	2.50	2	55.6	3	4	0	0
Val	18089	0	0	0	1	0	0.25	0			4	0	0
Teddy Bear	18197	0	0	0	1	1	0.17	0			4	0	0
Arthur	18198	0	0	0	1	1	1.00	2	19	1	4	0	0
Troy	18323	0	0	0	1	1	3.50	2	38	2	4	0	0
Etta	18379	0	0	0	2	0	8.00	3	30.6	2	4	0	0
Scotty	18540	0	0	0	1	1	1.50	2	5	1	4	0	0
Tifa	18601	0	0	0	1	0	1.00	2	8.6	1	4	0	0
Trevor	18650	0	0	0	1	1	1.00	2	71	3	4	0	0
Scarlett	18944	0	0	0	1	0	1.00	2	53	2	4	0	0
Plum	19047	0	0	0	1	0	1.00	2	38.6	2	4	0	0
Apple	19048	0	0	0	1	0	2.00	2	47	2	4	0	0
Logan	19225	0	0	0	2	1	10.00	3	26	2	4	0	0
Veruca Salt	19234	0	0	0	1	0	1.00	2	22.6	1	5	0	0
Willy	19235	0	0	0	1	1	0.33	1			5	0	0
Wonka	19236	0	0	0	1	1	0.33	1			5	0	0
Rocky	24389	0	0	1	1	1	11.00	3	59	3	1	0	0
Jazzie	24325	0	0	0	2	0	4.00	2	33.8	2	3	0	0
Kita	22771	0	0	0	1	0	2.00	2	37.6	2	1	0	0
Rennie	23192	0	0	1	1	1	5.00	2	86.5	3	1	0	0
Snuggles	23072	0	0	0	2	1	15.00	3	4.4	1	1	0	0
Dahlia	23106	0	0	0	1	0	1.00	2	52	2	4	0	0
Bella	23132	0	0	0	1	0	2.00	2	11	1	1	0	0
Frankie	23136	0	0	0	2	1	0.75	1			5	0	0
Elsie	23138	0	0	0	2	0	2.00	2	39	2	5	0	0
Wendel	23139	0	0	0	1	1	0.58	1			5	0	0
Hilde	23140	0	0	0	1	0	0.58	1			5	0	0
Spencer	23141	0	0	0	1	1	0.67	1			5	0	0
Sasha	23677	0	0	1	2	0	7.00	2	80	3	1	0	0
JD	23171	0	0	0	1	1	1.00	2	42	2	1	0	0
Milo	23194	1	1	0	2	1	7.00	2	10.8	1	5	1	0
Sugar	23195	1	1	0	1	0	0.58	1			5	1	0
Bear	23196	0	0	0	1	1	0.75	1			5	0	0
Falcor	23208	0	0	0	1	1	5.00	2	72	3	4	0	0
Raine	23209	0	0	0	1	0	1.00	2	36	2	4	0	0
Diamond	23219	0	0	0	2	0	10.00	3	60	3	1	0	0
Tank	23235	0	0	0	2	1	2.00	2	70	3	1	0	0
Pinky	23270	0	0	0	2	0	8.00	3	61	3	1	0	0
Rose	23272	0	0	0	1	0	0.42	1			5	0	0
Sadie	23273	0	0	0	1	0	0.42	1			5	0	0
Carly	23274	0	0	0	1	0	0.42	1			5	0	0
Bronx	23275	0	0	0	1	1	0.25	0			5	0	0
Columbus	23276	0	0	0	1	1	0.25	0			5	0	0
Karl	23277	0	0	0	1	1	2.00	2	16	1	4	0	0
Tiny	23286	1	1	0	2	0	14.00	3	16	1	1	1	0
Pepper Ann	23297	0	0	0	2	0	2.00	2	40.6	2	4	0	0
Mia	23307	0	0	0	1	0	0.17	0			1	0	0
Hunter	23312	1	1	0	2	1	5.00	2	30	2	1	1	1
Audrey	23310	0	0	0	1	0	1.00	2	26	2	1	0	0
Max	23331	0	0	0	1	1	0.74	1			1	0	0
Eva	23400	1	1	1	2	0	4.00	2	32	2	5	1	0
Cannon	23355	0	0	0	2	1	2.00	2	14	1	5	0	0
Pepperoni	23356	0	0	0	2	1	2.00	2	15	1	5	0	0
Rhea	23357	0	0	0	2	0	2.00	2	37	2	5	0	0
Little Ricky	23369	0	0	0	2	1	3.00	2	20	1	4	0	0
Taz	23370	0	0	0	2	1	10.00	3	17.8	1	4	0	0
Skooter	23381	0	0	0	1	1	1.00	2	61	3	1	0	0
Sadie	23383	0	0	0	2	0	6.00	2	63.8	3	1	0	0
Cottontail	23385	0	0	0	1	1	0.75	1			5	0	0
Harley	23386	0	0	0	1	0	1.00	2	49	2	5	0	0
Pearl	23387	0	0	0	1	0	1.00	2	14	1	5	0	0
Smoochie	23390	0	0	0	2	0	8.00	3	50	2	1	0	0
Chloe	23396	0	0	0	1	0	1.00	2	43	2	1	0	0
Wanda	23397	0	0	0	1	0	1.00	2	21	1	4	0	0
Penny	23399	0	0	0	1	0	3.00	2	60	3	4	0	0
Brutus AKA Buster	24093	0	0	1	1	1	1.50	2	59	3	1	0	0
Jinx	23412	0	0	0	1	1	7.00	2	60	3	4	0	0
Kimberley	23473	0	0	0	2	0	3.00	2	24	1	5	0	0
Patches	23474	0	0	0	2	1	3.00	2	20	1	5	0	0
Maggie May	23475	0	0	0	2	0	1.00	2	7	1	5	0	0
Diesel	23524	0	0	0	2	1	5.00	2	65	3	1	0	0
Vader	23511	0	0	0	2	1	2.00	2	58	3	1	0	0
Rosie	23547	0	0	0	1	0	2.00	2	58	3	1	0	0
Veronica	23556	0	0	0	1	0	4.00	2	12	1	4	0	0
Coco	23572	0	0	0	2	1	2.00	2	40	2	1	0	0
Petunia	23611	0	0	0	1	0	1.00	2	38	2	5	0	0
Gunner	23614	0	0	0	2	1	4.00	2	72	3	1	0	0
Red	23617	1	1	0	1	1	7.00	2	83	3	1	0	1
Bandit	23911	0	0	1	1	1	5.00	2	60	3	1	0	0
Farrah	23620	0	0	0	1	0	2.00	2	40	2	1	0	0
Ryan	23621	0	0	0	2	1	2.00	2	53.8	2	1	0	0
Choco	23625	0	0	0	2	1	7.00	2	11	1	1	0	0
Hermosa	23629	0	0	0	2	0	3.00	2	25	2	1	0	0
Frost	23639	1	1	0	1	0	5.00	2	58	3	4	1	0
Ted	23702	1	1	1	2	1	3.00	2	36	2	5	1	1
Simba	23684	0	0	0	1	1	0.83	1			3	0	0
Lucy	23670	1	1	0	2	0	9.00	3	12	1	1	1	1
Nalee	23673	0	0	0	1	0	5.00	2	60	3	1	0	0
Remington	23686	0	0	0	1	0	5.00	2	64	3	1	0	0
Margo	23687	0	0	0	2	0	3.00	2	10	1	5	0	0
Angel	23688	0	0	0	1	0	5.00	2	51.4	2	1	0	0
Romeo	23690	0	0	0	2	1	8.00	3	95	3	1	0	0
LadyBug	23691	0	0	0	2	0	2.00	2	30	2	5	0	0
Tulip	23692	0	0	0	1	0	2.00	2	45	2	5	0	0
Angus	23693	0	0	1	1	1	0.83	1			5	0	0
Rogan	23694	0	0	0	1	1	0.33	1			5	0	0
Niles	23695	0	0	0	1	1	0.33	1			5	0	0
Declan	23696	0	0	0	1	1	0.33	1			5	0	0
Darcy	23697	0	0	0	1	0	0.33	1			5	0	0
Quinn	23698	0	0	0	1	0	0.33	1			5	0	0
Kerry	23699	0	0	0	1	0	0.33	1			5	0	0
Tildy	23707	1	1	0	1	0	14.00	3	59.6	3	4	1	0
Lady	23710	0	0	0	2	0	5.00	2	54	2	5	0	0
Peppa	23713	0	0	0	1	0	0.33	1			5	0	0
Piper	23713	0	0	0	1	0	0.92	1			5	0	0
Alice	23714	0	0	0	2	0	2.00	2	18	1	5	0	0
Marilyn	23715	0	0	0	1	0	2.00	2	9.5	1	5	0	0
Lonzo	23722	0	0	0	2	1	2.00	2	70.6	3	1	0	0
Batavia	23910	0	0	0	2	0	5.00	2	40	2	1	0	0
Daisy	23741	0	0	0	2	0	2.00	2	105.8	3	1	0	0
Coral	23765	0	0	0	2	0	4.00	2	71	3	1	0	0
Bolt	23775	1	1	0	2	1	4.00	2	22	1	5	1	0
Bernard	23776	0	0	0	1	1	4.00	2	9	1	5	0	0
Raymond	23777	0	0	1	2	1	4.00	2	10	1	5	0	0
Claudia	23778	0	0	0	1	0	4.00	2	12	1	5	0	0
Crystal	23779	0	0	0	1	0	6.00	2	10	1	5	0	0
Carrie	23780	0	0	0	2	0	6.00	2	10	1	5	0	0
Ellie aka Link	23774	0	0	0	2	0	1.00	2	17.6	1	5	0	0
Zane	23788	0	0	0	1	1	0.42	1			4	0	0
Miracle	23789	0	0	0	2	0	3.00	2	37	2	1	0	0
Snow Ball	23791	0	0	0	1	1	4.00	2	9.4	1	5	0	0
Layla	23798	0	0	0	1	0	5.00	2	10.5	1	5	0	0
Shylie	23847	0	0	1	2	0	1.50	2	40	2	5	0	0
Maxi	23800	0	0	0	1	0	0.83	1			5	0	0
Kiki	23801	0	0	1	2	0	2.00	2	55	3	5	0	0
Freckles	23806	0	0	0	1	0	6.00	2	23	1	1	0	0
Lobo	23807	0	0	0	1	1	10.00	3	67	3	1	0	0
Baby	23811	0	0	0	1	0	0.75	1		2	1	0	0
Kato	23812	0	0	0	1	1	0.75	1			1	0	0
Leo	23819	0	0	0	2	1	0.75	1			1	0	0
Alicia	23823	0	0	0	1	0	5.00	2	15	1	4	0	0
Annie	23829	0	0	0	1	0	4.00	2	43	2	4	0	0
Nibbles	23837	0	0	0	2	0	3.00	2	11	1	1	0	0
Brock	23868	0	0	0	1	1	0.75	1			1	0	0
Daphne	24388	0	0	0	2	0	6.00	2	35	2	3	0	0
Mopsie	23906	0	0	0	2	0	5.00	2	33.6	2	5	0	0
Roy	23907	0	0	0	1	1	3.00	2	68	3	5	0	0
Homer	23908	0	0	0	1	1	0.75	1			5	0	0
Simon	23909	0	0	0	1	1	1.00	2	10	1	5	0	0
Diesel	23937	0	0	0	1	1	10.00	3	12	1	5	0	0
Kujo	23938	0	0	0	1	1	12.00	3	7.5	1	5	0	0
Molly	23949	0	0	0	2	0	8.00	3	14.8	1	1	0	0
Tyler	23948	0	0	0	1	1	0.50	1			4	0	0
Georgina	23963	0	0	0	1	0	3.00	2	66	3	4	0	0
Sheila	23995	1	1	0	2	0	2.00	2	33	2	1	1	0
Sno	24006	0	0	0	2	0	1.00	2	15	1	1	0	0
Jordan	24005	0	0	0	1	1	3.00	2	58	3	1	0	0
Bucky	24009	0	0	0	2	1	2.00	2	49	2	5	0	0
Lulu	24010	0	0	0	2	0	2.00	2	37.4	2	5	0	0
Lexie	24011	0	0	0	2	0	5.00	2	61	3	5	0	0
Rocky	24030	0	0	0	2	1	2.00	2	75	3	5	0	0
Carmello	24023	0	0	0	2	1	0.50	1			1	0	0
Horace	24031	0	0	0	1	1	0.50	1			5	0	0
Stoutie	24032	0	0	0	1	0	3.00	2	54	2	5	0	0
Odin	24036	0	0	0	2	1	3.00	2	45	2	1	0	0
Tank	24046	1	1	0	1	1	2.00	2	76.4	3	1	1	0
Lexie	24047	1	1	0	1	0	2.00	2	65.4	3	1	1	1
Lyla	24052	0	0	0	1	0	0.83	1			1	0	0
Gunther	24059	0	0	0	2	1	3.00	2	46.6	2	5	0	0
Athena	24060	0	0	0	2	0	2.00	2	48.2	2	5	0	0
Lambchop	24061	0	0	0	1	0	0.58	1			5	0	0
Louie	24063	0	0	0	2	1	10.00	3	10	1	1	0	0
Sonny	24065	0	0	0	2	1	8.00	3	78	3	5	0	0
Lilly	24083	0	0	0	1	0	3.00	2	20	1	1	0	0
Peaches	24228	0	0	1	1	0	6.00	2	90	3	1	0	0
Tucker	24095	0	0	0	2	1	3.00	2	54	2	1	0	0
Charlie	24097	0	0	0	2	1	3.00	2	8	1	1	0	0
Benji	24106	0	0	0	1	1	2.00	2	24	1	1	0	0
Missy	24107	0	0	0	2	0	1.00	2	30	2	5	0	0
Nick	24109	0	0	0	1	1	0.58	1			5	0	0
Zane	24158	0	0	1	1	1	1.00	1			5	0	0
Cole	24108	0	0	0	2	1	3.00	2	30.6	2	5	0	0
Max	24448	0	0	1	1	1	3.00	2	55	3	1	0	0
Taylor	24127	0	0	0	1	0	5.00	2	17.2	1	1	0	0
Tinkerbell	24133	1	1	0	1	0	3.00	2	38	2	4	1	0
Christopher	24161	0	0	0	2	1	2.00	2	12.25	1	4	0	0
Dirk	24162	0	0	0	1	1	0.33	1			5	0	0
Brandy	24163	0	0	0	1	0	0.33	1			5	0	0
Rex	24357	0	0	1	1	1	0.33	1			5	0	0
Amelia	24165	0	0	0	1	0	0.50	1			5	0	0
Panda	24166	0	0	0	1	0	0.75	1			5	0	0
Duke	24167	0	0	0	1	1	2.00	2	41.2	2	5	0	0
Auden	24173	0	0	0	1	0	5.00	2	64.8	3	4	0	0
Yoda	24190	0	0	0	2	1	2.00	2	55	3	1	0	0
Daisy	24268	0	0	1	2	0	6.00	2	36	2	1	0	0
Bob	24203	0	0	0	1	1	1.00	2	59	3	5	0	0
Dax	24204	0	0	0	2	1	5.00	2	47	2	5	0	0
Beau	24276	0	0	1	1	1	2.00	2	49	2	5	0	0
Lupe	24206	0	0	0	2	0	0.75	1			5	0	0
Sarah	24207	0	0	0	2	0	3.00	2	54.2	2	5	0	0
Loften	24208	0	0	0	1	1	0.25	0			5	0	0
Cardi	24209	0	0	0	1	0	0.42	1			5	0	0
Thunder	24277	0	0	0	2	1	10.00	3	69	3	1	0	0
El Guapo	24387	0	0	0	2	1	7.00	2	24.6	1	1	0	0
Elija	24315	0	0	0	1	1	0.42	1			4	0	0
Otis	24316	0	0	0	2	1	0.75	1			1	0	0
Treman	24353	1	1	0	1	1	2.00	2	74	3	4	1	1
Dixie	24777	0	0	1	1	0	2.00	2	82	3	1	0	0
Harry	24379	0	0	0	2	1	4.00	2	16	1	1	0	0
Bailey	24400	0	0	0	2	0	4.00	2	28	2	1	0	0
Smokey	24411	0	0	0	2	1	6.00	2	60	3	1	0	0
Leo	24421	0	0	0	2	1	1.00	2	40.4	2	1	0	0
Scout	24434	0	0	0	1	0	2.00	2	11.8	1	1	0	0
Blaze	24435	0	0	0	2	1	4.00	2	51	2	1	0	0
Gracie	24437	0	0	0	2	0	2.00	2	55.6	3	1	0	0
Wally Marty	24439	1	1	0	1	1	2.00	2	17	1	4	1	0
Violet	24443	0	0	0	2	0	2.00	2	44	2	1	0	0
Duke	24455	0	0	0	1	1	6.00	2	62	3	1	0	0
Raven	24483	0	0	0	2	0	3.00	2	97	3	1	0	0
Brooke	24526	0	0	1	2	0	7.00	2	46	2	4	0	0
Baby	24534	0	0	0	1	0	3.00	2	26	2	1	0	0
Parker	24535	0	0	0	1	0	0.33	1			5	0	0
Buffy	24536	0	0	0	1	0	2.00	2	35	2	5	0	0
Simba	24537	0	0	0	1	1	4.00	2	52	2	5	0	0
Barney	24538	0	0	0	1	1	1.00	2	36	2	5	0	0
Jed	24539	0	0	0	1	1	0.25	0			5	0	0
Traeger	24540	0	0	0	1	1	0.25	0			5	0	0
Jonah	24541	0	0	0	1	1	0.25	0			5	0	0
Joseph	24542	0	0	0	1	1	0.25	0			5	0	0
Perkins	24543	0	0	0	1	0	0.25	0			5	0	0
Josie	24544	0	0	0	1	0	0.25	0			5	0	0
Josephine	24545	0	0	0	1	0	0.25	0			5	0	0
Claire	24546	0	0	0	1	0	0.25	0			5	0	0
Meg	24547	0	0	0	1	0	0.25	0			5	0	0
Jodie	24548	0	0	0	1	0	0.25	0			5	0	0
Tess	24549	0	0	0	1	0	0.25	0			5	0	0
Charlotte	24550	0	0	0	1	0	0.25	0			5	0	0
Autumn	24739	0	0	1	2	0	5.00	2	40	2	1	0	0
Bentley	24591	1	1	0	1	1	7.00	2	94	3	1	1	0
Molly	24630	0	0	0	2	0	3.00	2	30.8	2	1	0	0
Copper	24644	0	0	0	1	1	1.00	2	34	2	1	0	0
Hecate	24674	0	0	1	1	0	3.00	2	46	2	4	0	0
Marlo	24683	0	0	0	2	1	1.00	2	29	2	1	0	0
Joleen	24697	1	1	0	2	0	3.00	2	57	3	1	1	0
Bonita	24694	0	0	0	1	0	2.00	2	49	2	4	0	0
RachetRose	24710	0	0	0	1	0	0.25	0			5	0	0
Mocha	24711	0	0	0	1	0	0.25	0			5	0	0
RescueRule	24712	0	0	0	1	0	0.25	0			5	0	0
Ollie	24714	0	0	0	1	1	0.25	0			5	0	0
Chelsea	24722	0	0	0	1	0	2.00	2	10	1	5	0	0
Carmen	24723	0	0	0	1	0	0.25	0			5	0	0
Tater	24725	0	0	0	1	1	0.33	1			5	0	0
Bee Bee	24726	0	0	0	1	0	0.25	0			5	0	0
Cee Cee	24727	0	0	0	1	0	0.25	0			5	0	0
Gee Gee	24728	0	0	0	1	0	0.25	0			5	0	0
Copper	24729	0	0	0	1	1	0.25	0			5	0	0
Shayna	24730	0	0	0	1	0	0.25	0			5	0	0
Hulu	24734	0	0	0	1	0	0.25	0			5	0	0
Kenzi	23172	0	0	1	1	0	4.00	2	40	2	1	0	0
Macy	23940	1	1	1	2	0	8.00	3	19.4	1	1	1	0
Golden aka Griffon	23492	1	1	1	2	1	3.00	2	58	3	5	1	0
Max	25235	0	0	1	2	1	10.00	3	42	2	1	0	0
McCoy	25784	0	0	0	2	1	6.00	2	79.6	3	1	0	0
Alex	25607	0	0	0	2	0	5.00	2	120.6	3	1	0	0
Plum	25342	0	0	1	1	0	4.00	2	53	2	1	0	0
Riley AKA Avy	24692	0	0	1	1	0	3.00	2	42.8	2	4	0	0
Bella-Wella	25851	0	0	0	1	0	5.00	2	21.6	1	1	0	0
Jackson	25792	0	0	1	2	1	3.00	2	54	2	1	0	0
Ox	25108	0	0	0	1	1	2.00	2	90	3	4	0	0
Lamb	25109	0	0	0	1	0	2.00	2	73	3	4	0	0
Angus	24843	0	0	1	1	1	0.83	1			5	0	0
Negan	24018	0	0	0	2	1	1.00	2	56.8	2	1	0	0
Odin	25455	0	0	0	2	1	4.00	2	45	2	3	0	0
Lilly	25673	0	0	1	1	0	4.00	2	27	2	1	0	0
Bella	24193	0	0	0	1	0	2.00	2	44	2	1	0	0
Phineas Magee	25842	0	0	1	1	1	3.00	2	16.6	1	4	0	0
Bella	24473	0	0	0	2	0	2.00	2	55	3	1	0	0
Mega	25610	0	0	0	2	1	6.00	2	59.5	3	4	0	0
Cyrus	24609	1	2	0	1	1	0.83	1			1	0	1
Duke	25281	1	1	0	2	1	6.00	2	58	3	3	1	0
Neo	25831	1	1	0	2	1	3.00	2	60	3	4	0	0
Bailey	24642	0	0	0	2	0	5.00	2	15.4	1	5	0	0
Ava	24650	1	1	0	1	0	7.00	2	60	3	4	0	0
Dee Dee	24899	0	0	1	2	0	3.00	2	56	3	1	0	0
Roo Roo	24822	0	0	1	1	0	0.33	1			5	0	0
Green Bud	24865	0	0	1	1	0	0.33	1			5	0	0
Danny	24724	0	0	0	2	1	4.00	2	51	2	5	0	0
Wilda	24731	0	0	0	1	0	0.25	0			5	0	0
Randy	24732	0	0	0	1	1	0.25	0			5	0	0
Dee	24733	0	0	0	1	0	0.25	0			5	0	0
Catty	24735	0	0	0	1	1	0.25	0			5	0	0
Isaac	24743	0	0	0	1	1	0.33	1			4	0	0
Jill	24760	0	0	0	1	0	1.00	2	43	2	1	0	0
Blu	25155	0	0	1	2	1	1.00	2	73	3	1	0	0
Freddy	24782	0	0	0	1	1	13.00	3	52	2	1	0	0
Helen	24792	0	0	0	1	0	9.00	3	8	1	4	0	0
King	24795	0	0	0	1	1	6.00	2	12.4	1	1	0	0
Sugar	24829	1	1	0	2	0	13.00	3	36.8	2	1	1	1
Lola	24926	0	0	0	2	0	4.00	2	3.87	1	3	0	0
Moe	24867	0	0	0	1	1	2.00	2	82	3	1	0	0
Rodney	24883	0	0	0	2	1	4.00	2	25	2	4	0	0
Daisy	24908	0	0	0	2	0	7.00	2	7.3	1	1	0	0
Nala	24909	0	0	0	1	0	2.00	2	59	3	1	0	0
Moscato	24911	0	0	0	1	1	0.33	1			5	0	0
Merlot	24912	0	0	0	1	1	0.25	0			5	0	0
Zinfandel	24913	0	0	0	1	0	0.25	0			5	0	0
Chardonnay	24914	0	0	0	1	0	0.25	0			5	0	0
Janice	24915	0	0	0	1	0	2.00	2	41	2	5	0	0
Ginger	24916	1	2	0	2	0	6.00	2	71	3	5	1	1
Dahlia	24917	0	0	0	1	0	0.92	1			5	0	0
Dillard	24918	0	0	0	1	1	1.00	2	46	2	5	0	0
Domingo	24920	0	0	0	2	1	7.00	2	64	3	4	0	0
Jolie	24929	0	0	0	2	0	3.00	2	37	2	4	0	0
Lucy	25538	0	0	0	2	0	10.00	3	62	3	4	0	0
Nellie Harper	24949	0	0	0	2	0	5.00	2	58.2	3	4	0	0
Vivian	24960	0	0	0	1	0	3.00	2	24	1	4	0	0
Toto	24971	0	0	0	2	1	1.00	2	9	1	4	0	0
Diesel	25392	0	0	1	2	1	9.00	3	64.6	3	5	0	0
Trixie	25853	0	0	1	1	0	9.00	3	60	3	4	0	0
Midnight	25055	0	0	0	2	1	4.00	2	60	3	1	0	0
Kuda	25090	0	0	0	2	1	13.00	3	45	2	1	0	0
Digger	25110	0	0	0	2	1	8.00	3	23	1	1	0	0
Bear	25112	0	0	0	2	1	10.00	3	96	3	1	0	0
Milton	25113	0	0	0	2	1	9.00	3	80	3	1	0	0
Baby Girl	25114	0	0	0	1	0	1.00	2	18	1	1	0	0
Knala	25124	0	0	0	2	0	2.00	2	49	2	1	0	0
Hannah	25217	0	0	1	1	0	0.25	0			1	0	0
Molly	25136	0	0	0	1	0	11.00	3	12	1	5	0	0
Pepper	25137	1	1	0	2	0	8.00	3	18.6	1	5	1	1
Milkshake	25168	0	0	0	2	0	8.00	3	6	1	1	0	0
Abigail	25176	0	0	0	1	0	0.58	1			5	0	0
Hopper	25179	0	0	0	1	1	0.58	1			5	0	0
Jasper	25180	0	0	0	1	1	1.00	2	38	2	5	0	0
Robin	25181	0	0	0	1	0	2.00	2	21	1	5	0	0
Marmaduke	25183	1	1	0	1	1	0.75	1			5	0	1
Tony	25175	0	0	0	1	1	0.58	1			5	0	0
Samantha	25174	0	0	0	1	0	0.33	1			5	0	0
Joan	25173	0	0	0	1	0	0.58	1			5	0	0
April	25177	0	0	0	2	0	2.00	2	26.4	2	5	0	0
Jett	25172	0	0	0	1	1	0.58	1			5	0	0
Springer	25178	0	0	0	1	0	0.58	1			5	0	0
Rosie	25182	0	0	0	1	0	2.00	2	28	2	5	0	0
Sugar	25184	0	0	0	2	0	0.58	1			5	0	0
Tipper	25195	0	0	0	2	0	5.00	2	57	3	1	0	0
Louise	25196	0	0	0	2	0	3.00	2	48	2	1	0	0
Rosalina	25204	0	0	0	1	0	0.42	1			1	0	0
Catfish	25350	0	0	1	2	0	6.00	2	38	2	4	0	0
Bleu	25750	0	0	0	1	1	2.00	2	54	2	4	0	0
Rinaldo	25248	0	0	0	1	1	2.00	2	66	3	4	0	0
Winnie	25249	1	1	0	2	0	9.00	3	22.6	1	1	1	0
Nova	25254	0	0	0	1	0	7.00	2	57	3	1	0	0
Layla Rose	25821	1	1	1	2	0	2.00	2	60	3	1	1	1
Tin Tin	25260	0	0	0	2	1	11.00	3	24.8	1	1	0	0
Penny	25261	0	0	0	2	0	11.00	3	22	1	1	0	0
Tally	25262	0	0	0	2	0	7.00	2	39	2	1	0	0
Bru Bru	25760	1	1	1	2	1	0.75	1			1	1	0
Pearl Mae	25471	0	0	1	1	0	3.00	2	72	3	4	0	0
Vader	25391	1	1	1	1	1	2.00	2	55	3	1	1	0
Spartacus	25289	0	0	0	1	1	4.00	2	53	2	4	0	0
Deuce	25349	0	0	0	1	1	3.00	2	82	3	3	0	0
Spice	25337	0	0	0	1	0	4.00	2	34	2	1	0	0
Barney	25436a	0	0	0	1	1	4.00	2	36	2	1	0	0
Hattie	25348	1	1	0	2	0	10.00	3	7.6	1	4	1	0
Lady	25886	0	0	1	2	0	2.00	2	58.8	3	1	0	0
Penelope	25355	0	0	0	1	0	1.00	2	35	2	1	0	0
Thatcher	25367	1	1	0	1	1	1.00	2	25	2	1	0	1
Beau	25371	1	1	0	1	1	8.00	3	12	1	4	0	1
Brady	25374	0	0	0	1	1	1.00	2	63	3	1	0	0
Bobbi	25377	0	0	0	1	0	5.00	2	18.4	1	4	0	0
Molly	25606	0	0	1	1	0	8.00	3	12.6	1	3	0	0
Buffy	25403	0	0	0	2	0	4.00	2	12.6	1	3	0	0
Maggie	25404	0	0	0	2	0	5.00	2	13	1	3	0	0
Vinny	25393	0	0	0	1	1	2.00	2	64	3	4	0	0
Falco	25394	0	0	0	1	1	1.33	2	50	2	1	0	0
Sebastian	25399	1	1	0	2	1	5.00	2	39	2	1	0	1
Albert	25398	0	0	0	2	1	8.00	3	18.2	1	4	0	0
Tramp	25407	1	1	0	2	1	3.00	2	55	3	4	1	0
Mukwa	25896	0	0	0	2	1	1.00	2	37	2	1	0	0
Chief	25435	0	0	0	1	1	0.58	1			1	0	0
Anita	25436b	0	0	0	1	0	2.00	2	54	2	4	0	0
Buddy	25453	1	1	0	2	1	10.00	3	25	1	1	1	0
Jax	25456	0	0	0	2	1	0.75	1			1	0	0
Rosie	25496	0	0	0	2	0	2.00	2	9.4	1	5	0	0
Chance	25552	0	0	0	1	1	4.00	2	69.4	3	3	0	0
Thor	25499	0	0	0	1	1	0.17	0			1	0	0
Loki	25500	0	0	0	1	1	0.17	0			1	0	0
Captain America	25501	0	0	0	1	1	0.17	0			1	0	0
Scarlett	25502	0	0	0	1	0	0.17	0			1	0	0
Stark	25503	0	0	0	1	1	0.17	0			1	0	0
Hulk	25504	0	0	0	1	1	0.17	0			1	0	0
Pemberly	25505	0	0	0	1	0	0.17	0			1	0	0
Spiderman	25506	0	0	0	1	1	0.17	0			1	0	0
Tristan	25510	0	0	0	1	1	1.00	2	50	2	1	0	0
Claudio	25521	0	0	0	2	1	12.00	3	50	2	1	0	0
Lola	25222	1	1	0	2	0	12.00	3	16	1	1	0	0
Lady	25525	0	0	0	1	0	0.25	0			1	0	0
Snoopy	25526	0	0	0	1	1	0.25	0			1	0	0
Beto	25529	0	0	0	1	1	5.00	2	5.25	1	5	0	0
Rocket	25530	0	0	0	1	1	1.00	2	18.4	1	5	0	0
Western	25531	0	0	1	1	1	1.00	2	32	2	5	0	0
Ben	25532	0	0	1	1	1	2.00	2	42	2	5	0	0
Lance	25533	0	0	0	1	1	2.00	2	48	2	5	0	0
Max	25534	0	0	0	1	1	2.00	2	39.4	2	5	0	0
Ellie	25691	0	0	1	1	0	3.00	2	53	2	5	0	0
Carrie	25613	0	0	1	1	0	3.00	2	39.6	2	5	0	0
Milo	25535	0	0	0	2	1	2.00	2	27	2	5	0	0
Thelma	25554	0	0	0	1	0	0.33	1			5	0	0
Louise	25555	0	0	0	1	0	0.33	1			5	0	0
Maui	25556	0	0	0	1	1	0.25	0			5	0	0
Capri	25557	0	0	0	1	0	0.25	0			5	0	0
Mary AKA Kitty	25661	0	0	1	2	0	2.00	2	45	2	5	0	0
Casper	25559	0	0	0	1	1	4.00	2	29	2	5	0	0
SJ	25560	0	0	0	1	1	1.00	2	34.6	2	5	0	0
Rocky	25582	0	0	0	1	1	0.83	1			1	0	0
Jack	25665	0	0	1	1	1	8.00	3	27.7	2	5	0	0
Karma	25801	0	0	1	2	0	9.00	3	40	2	1	0	0
Yodi	25617	0	0	0	2	1	6.00	2	54	2	1	0	0
Loki	25621	0	0	0	1	1	5.00	2	59	3	1	0	0
Kiki	25797	0	0	1	2	0	0.83	1			1	0	0
Nya	25626	1	2	0	1	0	3.00	2	55	3	1	1	0
Shiloh	25627	0	0	0	2	0	4.00	2	40	2	4	0	0
Tru	25631	0	0	0	2	1	4.00	2	72	3	1	0	0
Blue	25632	0	0	0	2	1	4.00	2	82	3	1	0	0
Frida	25974	0	0	1	1	0	0.75	1			3	0	0
Taz	25733	0	0	1	2	1	25.00	3	7	1	5	0	0
Dierks Bentley	25658	0	0	0	1	1	2.00	2	54	2	4	0	0
Hercules	25705	0	0	1	2	1	1.00	2	83.4	3	1	0	0
Shadow	25669	0	0	0	1	1	0.58	1			1	0	0
Rocky	25670	0	0	0	1	1	0.58	1			1	0	0
Barney	25679	0	0	0	1	1	0.83	1			1	0	0
Fred	25680	0	0	0	1	1	0.83	1			1	0	0
Jasper	25708	0	0	0	1	1	3.00	2	19	1	5	0	0
Boomer	25782	0	0	1	1	1	1.00	2	12	1	5	0	0
Josie	25762	0	0	1	1	0	1.00	2	9.6	1	5	0	0
Clyde	25711	0	0	0	1	1	0.25	0			5	0	0
Bonnie	25712	0	0	0	1	0	0.33	1			5	0	0
Tyson	25713	1	1	0	2	1	1.00	2	75.8	3	5	1	0
Elijah	25714	0	0	0	1	1	0.42	1			5	0	0
Sarah	25715	0	0	0	1	0	0.50	1			5	0	0
Ruth	25716	0	0	0	1	0	0.42	1			5	0	0
Eugene	25829	0	0	1	2	1	2.00	2	47.8	2	4	0	0
Pickles	25766	1	1	0	1	1	3.00	2	15.8	1	1	1	0
Spike	25772	0	0	0	2	1	12.00	3	4	1	1	0	0
Burrito	25805	0	0	0	2	1	8.00	3	15	1	5	0	0
Winston	25813	0	0	0	1	1	1.00	2	10	1	1	0	0
Benton	25819	1	1	0	1	1	1.00	2	66	3	4	0	0
Awesome Possum	25826	0	0	0	2	1	13.00	3	8	1	5	0	0
Skye	25840	0	0	0	1	0	2.00	2	42	2	1	0	0
Rocco	25848	1	1	0	2	1	4.00	2	42	2	1	1	0
Sadie	25854	1	2	0	2	0	8.00	3	89	3	1	1	1
Sophie	25855	0	0	0	2	0	5.00	2	63	3	1	0	0
Nala	25880	0	0	0	1	0	0.42	1			1	0	0
Michi	25897	0	0	0	1	0	1.00	2	36	2	4	0	0
Baxter	25916	0	0	0	2	1	2.00	2	50	2	1	0	0
Zoey	25920	0	0	0	1	0	15.00	3	16	1	1	0	0
Butterfree	25928	0	0	0	1	0	0.33	1			5	0	0
Blissy	25981	0	0	1	1	0	0.33	1			5	0	0
Niko	25930	0	0	0	1	0	0.33	1			5	0	0
Lewis	25931	0	0	0	1	0	0.33	1			5	0	0
Henry	25932	0	0	0	1	1	0.33	1			5	0	0
Bella AKA Maybelle	26070	0	0	1	1	0	2.00	2	28.2	2	5	0	0
Quinn	25941	0	0	0	2	0	2.00	2	43	2	5	0	0
Porpoise	25960	0	0	0	1	0	2.00	2	47	2	1	0	0
Derby	25934	1	2	0	1	1	4.00	2	19.6	1	5	1	1

## Sheet: Returned Dogs September 2014-Ma
Name	Animal record number	Number of returns	Resource guarder on fb or poss (0=no; 1=yes)	Sex (0=female; 1=male)	Age (years)	Age class (0=puppy; 1=juv; 2=adult; 3=senior)	Weight (pounds) for adults and seniors only	Body size (1=small;2=medium;3=large)	Final disposition (1=adopted; 2=transferred; 3=euthanized; 4=returned to owner)
Roscoe	18013	1	1	1	1	2	80.4	3	3
Topher	18199	1	0	1	8	3	16.6	1	1
Jack	18377	1	0	1	3	2	14.2	1	1
Carter	17218	1	0	1	4	2	62	3	1
Katrina	17639	2	0	0	1	2	53	2	1
Boog	17841	1	1	1	0.75	1			3
Darla	18206	1	1	0	6	2	12	1	1
Gerta	18502	1	0	0	3	2	29.6	2	1
Charlotte	18347	1	0	0	1	2	49	2	1
Yukon	18735	2	1	1	2	2	92	3	3
Leigh	18256	1	0	0	2	2	52	2	1
Roscoe	18328	1	1	1	8	3	70.4	3	3
Klingon AKA Diane	22681	1	1	0	4	2	35	2	1
Pokey	19010	1	1	0	10	3	22.2	1	1
Duke	19216	1	1	1	4	2	73	3	1
Maria	19693	2	0	0	5	2	57	3	1
Sandy	19442	2	0	0	0.67	1			1
Shane	20214	1	0	1	2	2	80	3	1
Bingo	20192	1	0	1	0.67	1			1
Wylie	19945	1	0	1	0.67	1			1
Lux	22082	2	0	0	2	2	60	3	1
Hyde	19984	2	0	1	2	2	25	2	3
Plinko	21301	2	0	0	4	2	39	2	1
Fern	20164	2	1	0	0.5	1			1
Shep	20330	1	0	1	0.75	1			1
Swiss	21046	2	1	1	2	2	91.6	3	1
Sailor	20834	2	1	1	0.83	1			2
Honey	21772	2	0	0	9	3	84	3	1
Mochi	22202	1	1	1	10	3	18	1	1
Dani	22007	2	0	0	3	2	60	3	1
Nikov	22195	1	1	1	10	3	70	3	1
Gus Gus	21530	1	0	1	3	2	71	3	1
Chocolate	22220	1	1	1	2	2	16.2	1	1
Buck	21755	2	1	1	5	2	60	3	1
Burger	23003	3	1	1	5	2	69.8	3	1
Bucky	22198	1	0	1	4	2	65.6	3	3
Kira Belle	21853	1	0	0	1	2	28	2	1
Andie	22019	1	0	0	2	2	36	2	1
Tag	22081	2	0	1	0.583	1			1
Laci	22087	1	0	0	2	2	32	2	1
Jacalyn	22050	1	0	0	0.67	1			1
Junior	22524	1	1	1	2	2	21	1	1
Charlotte	22061	1	0	0	1	2	62	3	1
Daisy	20671	1	0	0	0.167	0			3
Izzy	18382	1	0	0	6.75	2	60	3	1
Pansy	18316	1	0	0	5	2	9.8	1	1
Fred	18475	1	0	1	3	2	18.4	1	1
Kesey	20271	1	0	1	1	2	50	2	1
Avery	18913	1	0	1	1	2	85	3	1
Lola AKA Ana	20806	1	0	0	0.167	0			2
Parker	18237	1	0	1	4	2	11.8	1	1
Ruby	18511	2	0	0	2	2	44	2	1
Jack	18602	1	0	1	5	2	56.8	3	1
Addie	19178	1	0	0	0.5	1			1
Bailey	18577	1	1	0	5	2	14	1	1
Lee Lee	18396	1	0	0	3	2	57	3	1
Tatiana	18133	1	0	0	2	2	63	3	3
Buddy	18839	1	0	1	9	3	16	1	1
Fiona	19677	2	0	0	2	2	54	2	1
Rocky	20915	1	0	1	7	2	13	1	4
Hunter	19772	1	1	1	5.92	2	60	3	1
Remi	19937	1	0	1	0.583	1			1
Sheba	20066	1	0	0	9	3	48	2	1
Sophie	21060	1	0	0	8	3	67	3	1
Willow	20189	1	0	0	4	2	51	2	1
Rudy	20311	1	1	1	6	2	50	2	1
Rex	20510	1	1	1	3	2	120	3	2
Smokey	21056	1	0	1	4	2	16.8	1	1
Presto	22636	3	0	1	10	3	68	3	3
Stanley	20747	1	0	1	4.17	2	68	3	1
Frodo	20472	1	0	1	2.33	2	23	1	1
Shane	20214	1	0	1	2	2	80	3	1
Spot	19400	2	1	1	3.42	2	19	1	1
Lucy AKA June	20262	1	0	0	4.42	2	41.8	2	4
Cameron	19589	1	0	0	2	2	64.6	3	1
Johnny	19563	1	0	1	7.92	2	65.4	3	2
Zoe AKA Penny	20057	1	0	0	0.42	1			1
Cali	19598	1	0	0	1.42	2	39.6	2	1
Alice	19960	1	0	0	5.42	2	66.4	3	1
Sweety	21177	2	0	0	3.42	2	50	2	1
Coal	20125	1	0	1	0.083	0			1
Gus	20637	2	0	1	0.083	0			1
Snoopy	20133	1	0	1	0.167	0			1
Peanut	20436	1	0	1	3	2	42.1	2	1
Toto	20804	1	0	1	0.67	1			1
Armando	20921	1	0	1	2	2	62	3	1
Jessi	20881	1	0	0	2.92	2	20	1	1
Tatum	20998	1	0	0	1	2	35.4	2	1
Louise	21025	1	0	0	0.167	0			1
Avy	22536	3	0	0	1	2	38.4	2	1
Abby	21309	1	0	0	5	2	46	2	1
Chubbers	21577	2	0	1	8	3	60	3	3
Stella	21675	2	0	0	0.583	1			1
Sky	21920	2	0	0	0.583	1			1
August	21997	1	1	0	8	3	71	3	1
Misha	22015	1	1	1	1	2	9.3	1	1
Elvis	22045	1	0	1	4.58	2	18.6	1	3
Pongo	22080	1	0	1	0.67	1			1
Gopher	22212	1	0	1	3	2	48	2	1
Emmy	22264	1	0	0	0.167	0			1
Gizmo	22270	1	0	1	0.67	1			1
Sydney	22533	1	0	0	0.25	0			1
Krypto	22917	1	0	1	1	2	23.6	1	1
Rennie	22827	1	0	1	5	2	86	3	3
Star	22201	1	0	0	10.75	3	71	3	1
Emmett	21652	1	0	1	3.75	2	47	2	1
Chaplin	21427	1	0	1	5	2	69	3	1
Pippin	22110	1	0	1	0.75	1			1
Charlie	21701	1	0	1	1	2	3.8	1	1
Ellie	21686	1	0	0	3	2	21.4	1	1
Maverick	22505	1	0	1	10.083	3	95	3	1
Jaguar	22076	1	0	1	2.5	2	52	2	1
Bella	22970	1	0	0	1.75	2	59.3	3	1
Sophie	23056	1	0	0	2	2	67	3	3
Bill	22859	1	0	1	6.5	2	56	3	3
Shelby	18209	1	0	0	9.5	3	18.6	1	1
Buddy	18615	1	0	1	3.58	2	76	3	1
Snoopy	18100	1	0	1	9.67	3	82	3	1
Roxanne AKA Lulu	18369	1	0	0	3.17	2	48	2	4
Esteban AKA Bravo	17412	1	0	1	3.42	2	18.4	1	1
Maggie	18265	1	0	0	7.67	3	22	1	1
Jacob	17232	2	0	1	4.92	2	75	3	1
William	18059	1	0	1	10.083	3	44	2	1
Rocky	24389	1	0	1	11	3	59	3	1
Archie aka Jack	23941	1	0	1	3.3	2	9.5	1	1
Bella	23587	1	1	0	1.5	2	60	3	1
Zeebe	24478	1	0	0	5.5	2	14.2	1	1
Ruben	23993	1	0	1	2.75	2	62	3	1
Delta	23488	1	0	0	14	3	5.1	1	3
Holly	24245	1	0	0	12	3	38.8	2	1
Bullet	23840	2	1	1	2.5	2	53	2	1
Kenzi	23172	1	0	0	4	2	40	2	1
Macy	23940	2	1	0	8	3	19.4	1	1
Golden	23492	2	1	1	3	2	58	3	1
Sasha	23677	1	0	0	7	2	80	3	3
Eva	23400	1	1	0	4	2	32	2	1
Ted	23702	1	1	1	3	2	36	2	1
Shylie	23847	2	0	0	1.5	2	40	2	1
Peaches	24228	1	0	0	5.5	2	90	3	1
Zane	24158	1	0	1	1	2	51	2	1
Max	24448	1	0	1	2.5	2	55	3	1
Rex	24357	1	0	1	0.33	1			1
Daisy	24268	1	0	0	6	2	36	2	1
Beau	24276	1	0	1	2	2	49	2	1
Dixie	24777	6	0	0	2	2	82	3	3
Brooke	24526	1	0	0	7	2	46	2	1
Autumn	24739	1	0	0	5	2	40	2	1
Angus	23693	1	1	1	0.83	1			1
Brutus AKA Buster	24093	1	1	1	1.5	2	59	3	1
Bandit	23911	1	0	1	5	2	60	3	1
Dee Dee	24899	1	0	0	3	2	56	3	1
Kiki	23801	2	0	0	2	2	55	3	1
Raymond	23777	1	0	1	4	2	10	1	Unknown
Plum	25342	2	0	0	1	2	38.6	2	1
Roo Roo	24822	1	0	0	0.25	0			1
Green Bud	24865	1	0	0	0.33	1			1
Blu	25155	1	0	1	1	2	73	3	1
Diesel	25392	1	0	1	9	3	64.6	3	1
Trixie	25853	1	0	0	9	3	60	3	1
Hannah	25217	1	0	0	0.25	0			1
Catfish	25350	1	0	0	6	2	38	2	1
Layla Rose	25821	1	1	0	2	2	60	3	1
Bru Bru	25760	2	1	1	0.75	1			1
Pearl Mae	25471	2	1	0	3	2	72	3	1
Molly	25606	1	0	0	8	3	12.6	1	1
Ellie	25691	1	0	0	3	2	53	2	1
Carrie	25613	1	0	0	3	2	39.6	2	1
Jack	25665	1	0	1	8	3	27.7	2	1
Karma	25801	1	0	0	9	3	40	2	1
Taz	25733	1	0	1	25	3	7	1	1
Hercules	25705	1	0	1	1	2	83.4	3	1
Boomer	25782	1	0	1	1	2	12	1	1
Frida	25974	1	0	0	0.75	1			2
Josie	25762	1	0	0	1	2	9.6	1	1
Eugene	25829	1	0	1	2	2	47.8	2	1
Blissy	25981	1	0	0	0.33	1			1
Bella AKA Maybelle	26070	1	0	0	2	2	28.2	2	1
Mary AKA Kitty	25661	1	0	0	2	2	45	2	1
Jackson	25792	1	0	1	3	2	55	3	1
Lilly	25673	1	0	0	4	2	27	2	1
Phineas Magee	25842	1	0	1	3	2	16.6	1	1
Max	25235	1	0	1	10	3	42	2	1
Malakai	19679	1	0	1	5	2	107	3	1
Hecate	24674	1	0	0	3	2	46	2	1
Vader	25391	1	1	1	2	2	55	3	1
Lady	25886	2	0	0	2	2	58.8	3	1
Scooters AKA Summer	18598	1	0	0	5	2	14.8	1	1
Jack	21641	1	0	1	2	2	9.5	1	1
Holly	22126	1	0	0	10.5	3	12.8	1	1
Ben	25532	1	0	1	2	2	42	2	1
Riley	26295	1	0	1	1.5	2	48	2	1
